# Supplementary material
Source: PubMed Central journal article supplement (PMC3527255)
Supplement: 0bb5acacb87e51dabd706c91ec2bdb92_genetics.112.144402-4.pdf [file 0bb5acacb87e51dabd706c91ec2bdb92_genetics.112.144402-4.pdf]

Cloning of baculoviral genes (*ie1*, *lef1*, *lef3* and *p74*) into TOPO vector

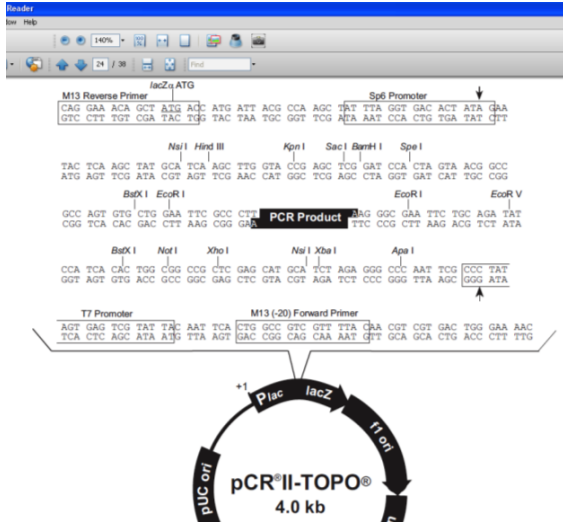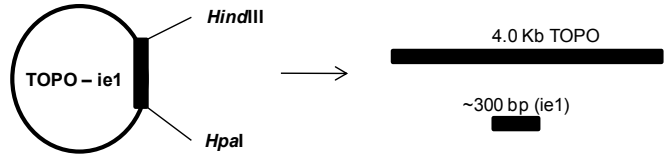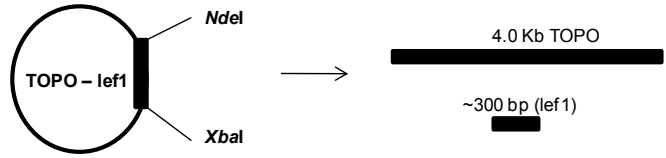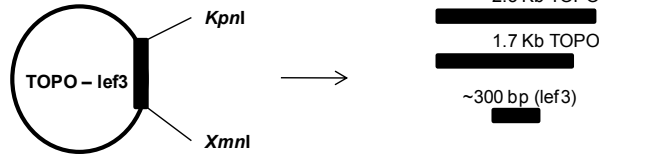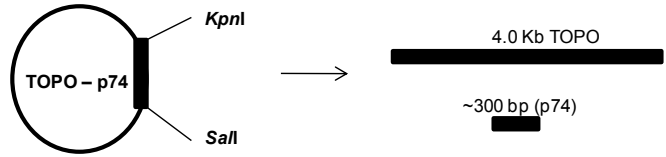

Step 1

A 316 bp fragment of *lef3* was cloned into pA3DS-FSG vector backbone using *Sall* and *NheI* sites to generate 1-gene construct, pA3Δ*lef3*

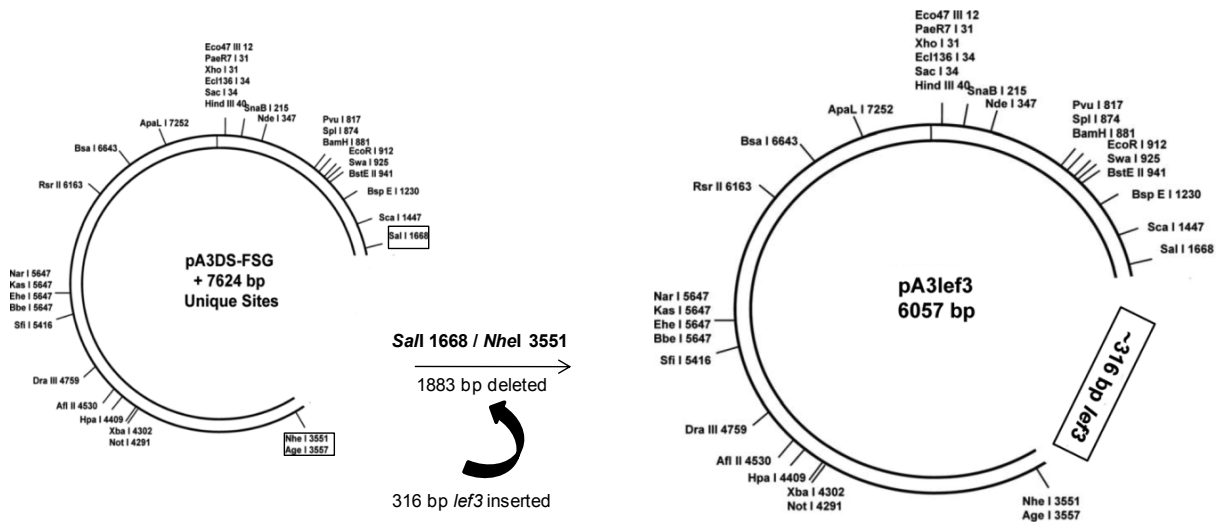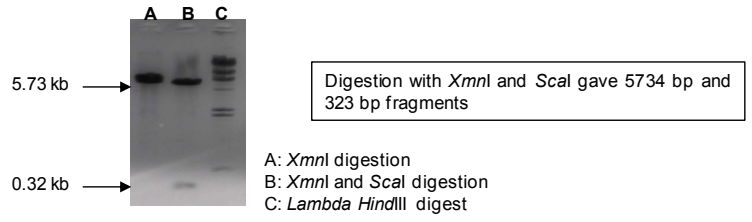

Step 2

A 310 bp fragment of *ie1* was cloned into pA3 $\Delta$ lef3 vector backbone using *Bsp*E1 and *Sal*I sites to generate 2-gene construct, pA3 $\Delta$ ie1lef3

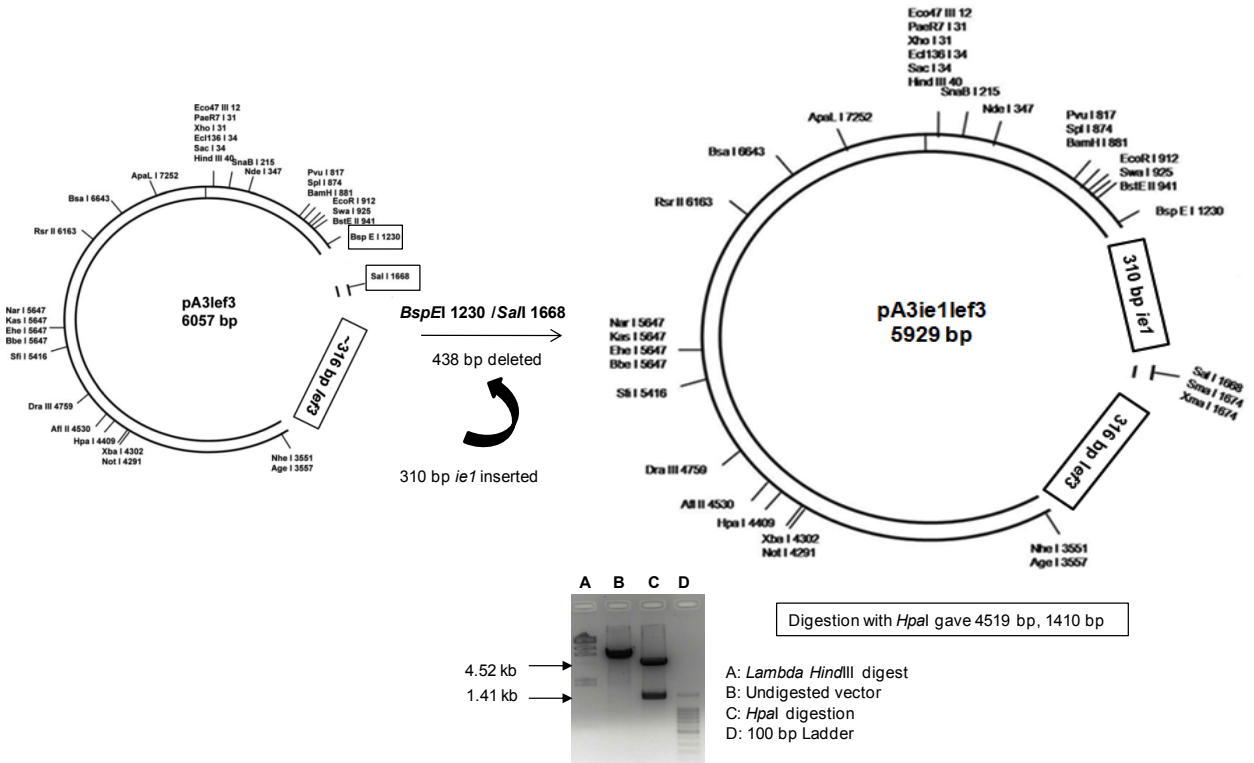

Step 3

A 800 bp fragment of *gfp* was cloned into pA3 $\Delta$ ie1ef3 vector backbone using *PvuI* and *BamHI* sites to generate 3-gene construct, pA3 $\Delta$ gfpie1ef3

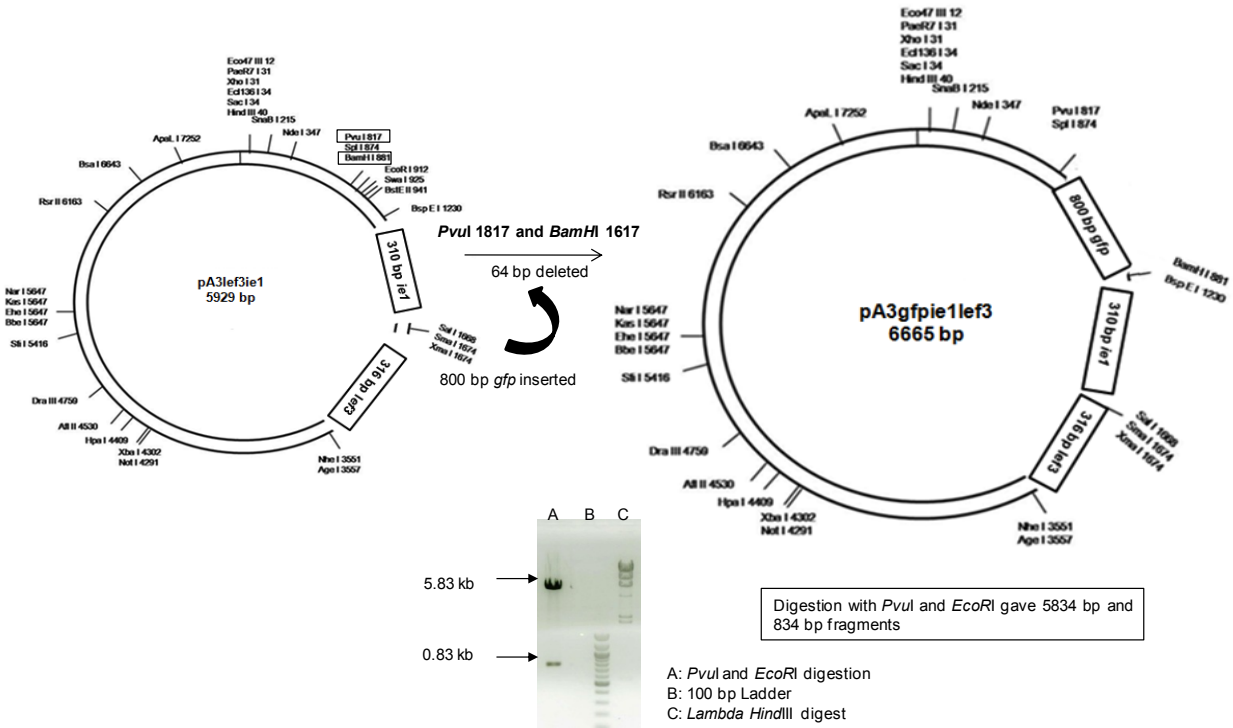

A 326 bp fragment of *lef1* was cloned into pA3Δgfpie1lef3 vector backbone using *Bam*HI and *Bsp*EI sites to generate 4-gene construct, pA3Δgfp1ef1lef3

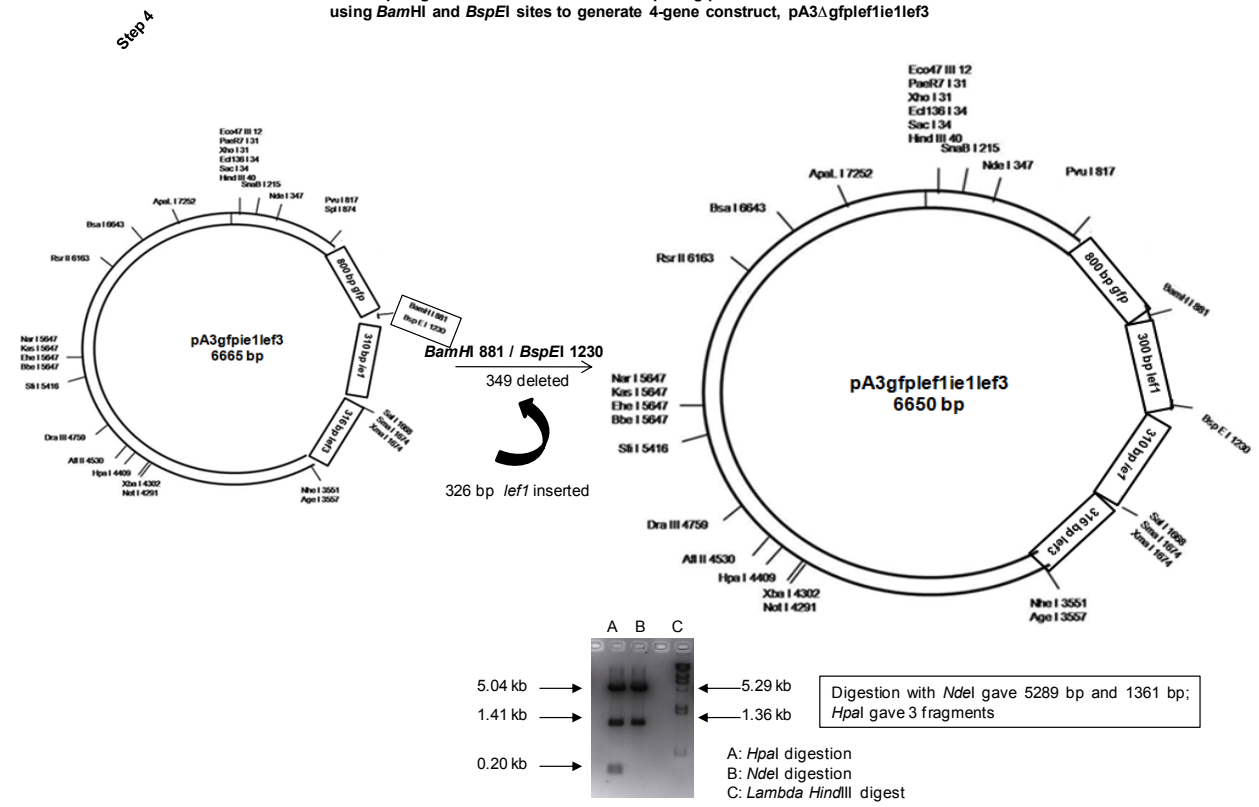

Step 5

A 310 bp fragment of *p74* was cloned into pA3Δ*gfplef1ie1lef3* vector backbone using *AgeI* and *XbaI* sites to generate 5-gene construct, pA3Δ*gfplef1ie1lef3p74*

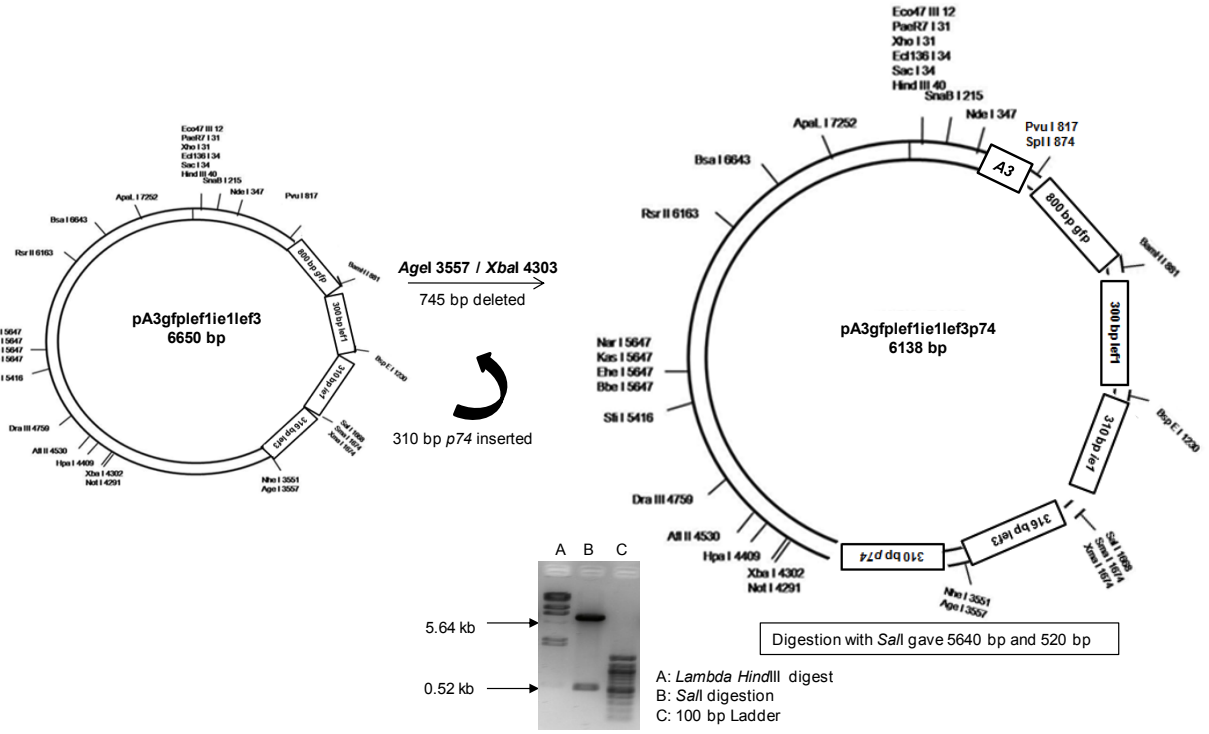

Step 6

1994 bp 5-gene sense fragment cloned to pP25(sp\*)DsRed vector backbone using *Bg*/II and *Age*I sites to generate pP25(sp\*)DsRed-A3ΔSsens-Spacer

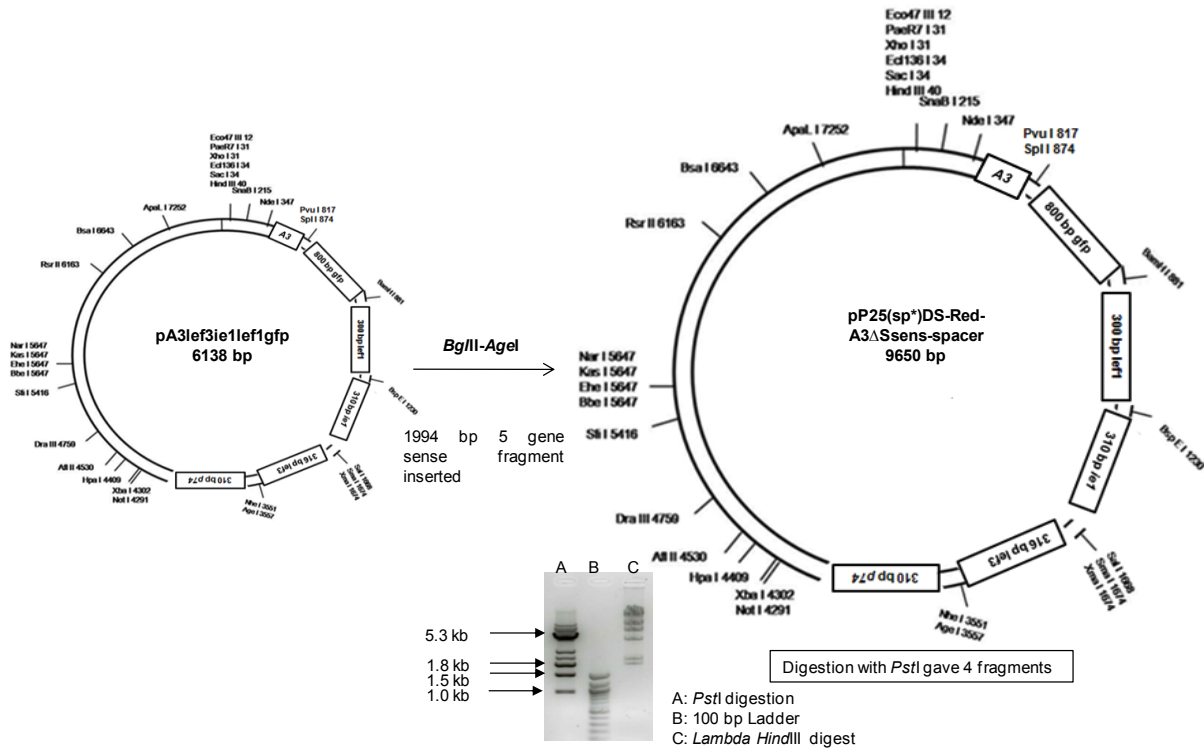

Step 7

Antisense fragment of five genes was cloned into intermediary form of sense-spacer vector backbone using *Afl*II – *Sse*8337I sites to generate pP25(sp\*)DsRed-A3ΔS Sense.Spacer.Antisense-Poly A region

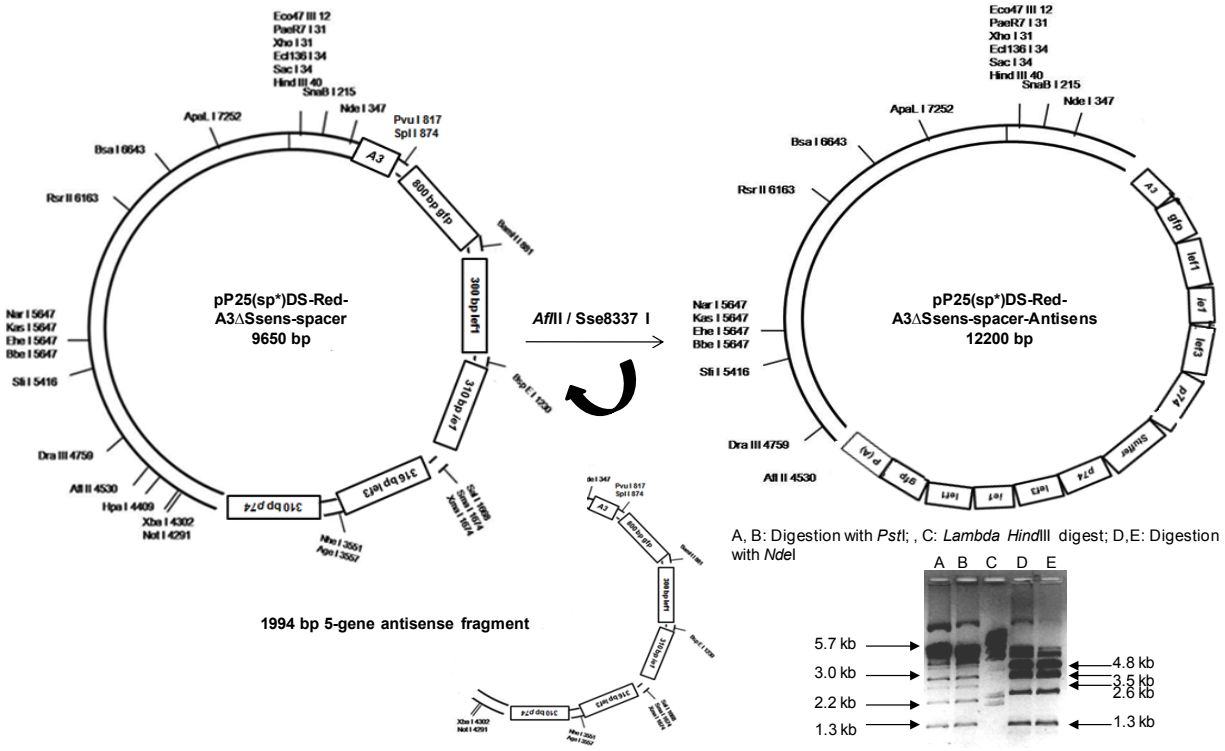



Step 8

pP25(sp\*)DsRed-A3ΔSSense.Spacer.Antisense-Poly A construct and PiggyP25IL2-(3xP3 DsRed2) TQ backbone vector were digested using *Bgl*II – *Sfi*I sites to generate PiggyA3ΔSSense-Spacer-Antisense(3xP3.DsRed2) multiple flip-flop piggyBac vector

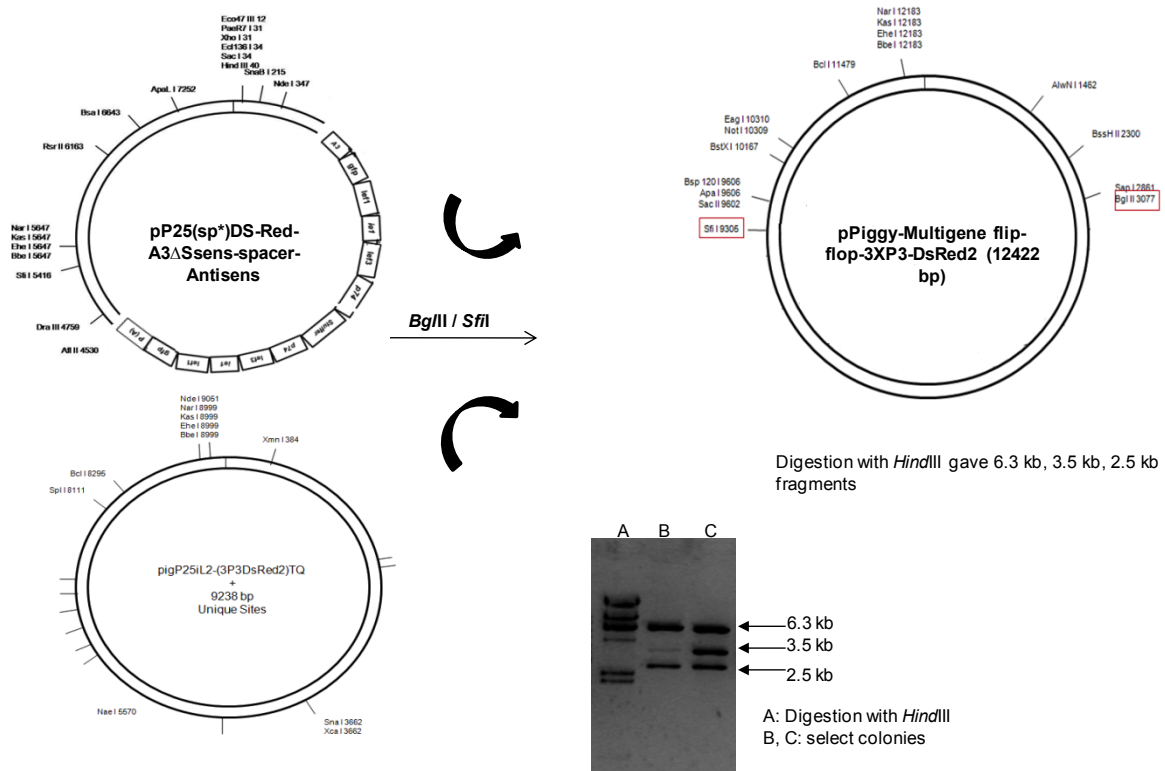

**Figure S1** The four baculoviral genes *ie1*, *lef1*, *lef3* and *p74* were initially cloned into pCRII TOPO vector (Invitrogen). The resultant plasmids were labeled as *Topo-ie1*, *Topo-lef1*, *Topo-lef3*, and *Topo-p74*. These vectors having right inserts were confirmed by restriction digestions and DNA sequencing for later use in cloning steps. The various steps involved in the construction of *pPiggyMG(+)*3XP3-GFP, *pPiggyMG(-)*3XP3-DsRed2 and *pPiggyMG(+/-)*3XP3-DsRed2 were schematically represented. The stepwise description is provided in the text.
