# Supplementary material
Source: PubMed Central journal article supplement (PMC3527255)
Supplement: 6f523977c9a9da1d99b5c3c4f9050760_genetics.112.144402-8.pdf [file 6f523977c9a9da1d99b5c3c4f9050760_genetics.112.144402-8.pdf]

**Table S4** Pairwise comparisons using Tukey HSD among groups on percentage mortality (values arcsin transformed) in transgenic lines, and their hybrids with CSR2 upon BmNPV treatment done after post-hoc analysis of the corresponding treatment factor using main effects in a one-way ANOVA.

| Lines                              | Mean Difference | Test Statistics | P level | Significance |     |
|------------------------------------|-----------------|-----------------|---------|--------------|-----|
| Transgenic lines                   |                 |                 |         |              |     |
| Control                            | IE              | 17.6925         | 7.8087  | 0.0001       | *** |
|                                    | MG(+/-)         | 41.0488         | 18.1171 | 0.0001       | *** |
|                                    | MG(+)           | 19.7788         | 8.7295  | 0.0001       | *** |
|                                    | MG(-)           | 26.6300         | 11.7533 | 0.0001       | *** |
|                                    | MG(+) x MG(-)   | 32.2100         | 14.2160 | 0.0001       | *** |
| IE                                 | MG(+/-)         | 23.3563         | 10.3084 | 0.0001       | *** |
|                                    | MG(+)           | 2.0863          | 0.9208  | 0.9863       |     |
|                                    | MG(-)           | 8.9375          | 3.9446  | 0.0791       |     |
|                                    | MG(+) x MG(-)   | 14.5175         | 6.4074  | 0.0007       | *** |
| MG(+/-)                            | MG(+)           | -21.2700        | 9.3876  | 0.0001       | *** |
|                                    | MG(-)           | -14.4188        | 6.3638  | 0.0008       | *** |
|                                    | MG(+) x MG(-)   | -8.8388         | 3.9010  | 0.0848       |     |
| MG(+)                              | MG(-)           | 6.8512          | 3.0238  | 0.2882       |     |
|                                    | MG(+) x MG(-)   | 12.4313         | 5.4866  | 0.0047       | **  |
| MG(-)                              | MG(+) x MG(-)   | 5.5800          | 2.4628  | 0.5132       |     |
| Hybrids of transgenic lines x CSR2 |                 |                 |         |              |     |
| Control x CSR2                     | IE x CSR2       | 21.5750         | 7.7516  | 0.0002       | *** |
|                                    | MG(+/-) x CSR2  | 38.8650         | 13.9637 | 0.0001       | *** |

|                |                      |          |        |        |     |
|----------------|----------------------|----------|--------|--------|-----|
|                | MG(+) x CSR2         | 14.9100  | 5.3570 | 0.0082 | **  |
|                | MG(-) x CSR2         | 21.6433  | 7.7762 | 0.0002 | *** |
|                | MG(+) x MG(-) x CSR2 | 27.6317  | 9.9277 | 0.0001 | *** |
| IE x CSR2      | MG(+/-) x CSR2       | 17.2900  | 6.2121 | 0.0017 | **  |
|                | MG(+) x CSR2         | -6.6650  | 2.3946 | 0.5465 |     |
|                | MG(-) x CSR2         | 0.0683   | 0.0246 | 1.0000 |     |
|                | MG(+) x MG(-) x CSR2 | 6.0567   | 2.1761 | 0.6431 |     |
| MG(+/-) x CSR2 | MG(+) x CSR2         | -23.9550 | 8.6067 | 0.0001 | *** |
|                | MG(-) x CSR2         | -17.2217 | 6.1875 | 0.0018 | **  |
|                | MG(+) x Mg(-) x CSR2 | -11.2333 | 4.0360 | 0.0758 |     |
| MG(+) x CSR2   | MG(-) x CSR2         | 6.7333   | 2.4192 | 0.5357 |     |
|                | MG(+) x MG(-) x CSR2 | 12.7217  | 4.5707 | 0.0322 | *   |
| MG(-) x CSR2   | MG(+) x MG(-) x CSR2 | 5.9883   | 2.1515 | 0.6538 |     |

The significance between each of the groups was calculated as a *P* value. \**P* < 0.05; \*\* *P* < 0.01; \*\*\**P* < 0.001.
