# Supplementary material
Source: PubMed Central journal article supplement (PMC3527255)
Supplement: 41b25ed508dfba1fc8e295ef8d2288c5_genetics.112.144402-7.pdf [file 41b25ed508dfba1fc8e295ef8d2288c5_genetics.112.144402-7.pdf]

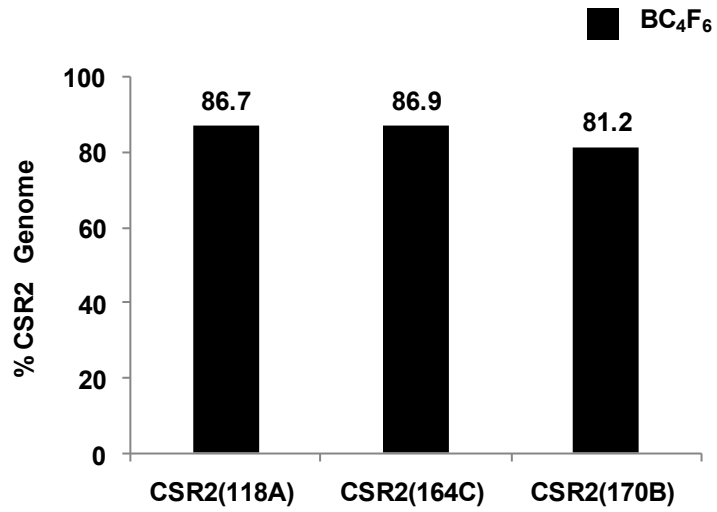

**Figure S4** Histogram representing percentage incorporation of the CSR2 genome in the BC<sub>4</sub>F<sub>6</sub> population of transgenic lines, CSR2(118A), CSR2(164C) and CSR2(170B) obtained through recurrent backcross strategy, as measured by CSR2-specific SSR alleles from 10 loci.
