# Supplementary material
Source: PubMed Central journal article supplement (PMC3527255)
Supplement: 89e807bd3faa7d1c93b0dbb299d179c3_genetics.112.144402-11.pdf [file 89e807bd3faa7d1c93b0dbb299d179c3_genetics.112.144402-11.pdf]

File S3

Genomic DNA sequences of different MG(+/-) transgenic lines surrounding *piggyBac* insertions, with the **TTAA** duplicated sequence appearing at all 5' and 3' insert boundaries. TTAA sequences which are characteristic of *piggyBac* mediated transposition are shown in red colour.

MG(+/-)118A

ACTATCTTTCTAGGG**TTAA**TGATTGAATGCAAACATCAGCGATATGAGAGTAACAAATCAGCTTTAGCGATAAACCTCTACAAGAACAAACGA  
ACTACAATAGGTACTTATTATGTTTTAATAAACTTTTATTATCTTCACACGTTTATTACTATGTATGTATGTNACGGAACTTTGAACATGATTT  
TCACCCCTTCAAACGTCGGACTAACTCAAATTTGGCATACGTATTTATGATTGATGACAATTCAATATTTAATCAGTTAGATCCAAGGAG  
AGGACAGCGATTCTCGTACANACGGTCGCG

MG(+/-)154C

ATGCATGCGTCAATTTTACGCAGACTATCTTTCTAGGG**TTAA**GCAAAGCGGACGTGCGGGCCACAATAGTCGTGCTCATAAAATTTGTGGG  
TAGATAGTATATGGCACGATCCAAGGCGAGGACGGCGATTTC

MG(+/-)154D

AGCGATATTTCAAGCATGCATGCGTCAATTTTACGCAGACTATCTTTCTAGGG**TTAA**GCGAGAAGCGGACGTGCGGGCCACAATAGTCGTGCTC  
ATACAAATTTGTGGGTAGATAGTATATGGCACGATCCAAGGCGAGGACCGCGATTCTCGTACAAGGGGGGGG

MG(+/-)164B

GGGCGTTTCGCGCTATTTGGAAAGAGAGAGCAATTTCAAGAATGCATGCGTCAATTTTACGCAGGACTATCTTTCTAGGG**TTAA**GCAAAA  
GCGGACGTGCGGGCCACAATAGTCGTGCTCATAAAATTTGTGGGTAGATAGTTATATGTCACGATCCAAGGAGAGGACAGCGATTCTCGTA  
CACGAGGACAGCGATTCTCGTACAC

MG(+/-)164C

TCGCGCTATTTGGAAAGAGAGAGCAATTTTCAAGAATGCATGCGTCAATTTTACGCAGACTATCTTTCTAGGG**TTAA**GCAAAGCGGACGT  
GCGGGCCACAATAGTCGTGCTCATAAAATTTGTGGGTAGATAGTTATATGTCACGATCCAAGGAGAGGACAGCGATTCTCGTACAACGGT  
TACGATTCGAGAAGGG

MG(+/-)170A

ATTCAGAATGCATGCGTCATTTTACGCAGACTATCTTTCTAGGGTTAAATAAAATATGTAAATGAACAAAAACCGAATCCGAGTTTTTCAGT  
ACAAATCGGCAATTCATACTTTAACCCCTTATATTATCGTTACGATAATACATTTATATATAGCAATTATTATAAAATACTAAAATATCTTCAAC  
AAAATTTACTTACAGAAATCAATCGAAAACATATTTCTTTAGATCCAAGGAGAGGACAGCGGATTCTCGTACAGCCGGCGGCGATTTCGTGAA  
GGG

MG(+/-)170B

CGGGCGGATTGCGCTATTTAGAAAAGAGAGAGCAATATTTCAAGNAATGCATGCGTCAATTTTACGCAGACTATCTTTCTAGGGTTAAATAAGC  
GTGTTACGTTTTGGACATGTTTTGCACTGAAACGAGATCCAAGGAGAGGACAGCGATTCTCGTACAAACGGTTACGATTTCGAGAAGGGAG  
AG
