# Supplementary material
Source: PubMed Central journal article supplement (PMC3527255)
Supplement: 261bd7b3986572ffcec44fac7f7d8d0e_genetics.112.144402-14.pdf [file 261bd7b3986572ffcec44fac7f7d8d0e_genetics.112.144402-14.pdf]

**Table S5** Pairwise comparisons using Tukey HSD among groups on viral accumulation rate (values logarithm transformed) in transgenic and control lines upon BmNPV treatment was done after post-hoc analysis of the corresponding treatment factor using main effects in a one-way ANOVA.

|         | Lines         | Mean Difference | Test Statistics | P level | Significance |
|---------|---------------|-----------------|-----------------|---------|--------------|
| Control | IE            | 0.5094          | 9.0023          | 0.0001  | ***          |
|         | MG(+/-)       | 1.0496          | 18.5470         | 0.0001  | ***          |
|         | MG(+)         | 0.5066          | 8.9521          | 0.0001  | ***          |
|         | MG(-)         | 0.7257          | 12.8241         | 0.0001  | ***          |
|         | MG(+) x MG(-) | 0.9304          | 16.4417         | 0.0001  | ***          |
| IE      | MG(+/-)       | 0.5401          | 9.5448          | 0.0001  | ***          |
|         | MG(+)         | -0.0028         | 0.0501          | 1.0000  |              |
|         | MG(-)         | 0.2163          | 3.8219          | 0.0961  |              |
|         | MG(+) x MG(-) | 0.4210          | 7.4394          | 0.0002  | ***          |
| MG(+/-) | MG(+)         | -0.5430         | 9.5949          | 0.0001  | ***          |
|         | MG(-)         | -0.3239         | 5.7229          | 0.0029  | **           |
|         | MG(+) x MG(-) | -0.1191         | 2.1053          | 0.6732  |              |
| MG(+)   | MG(-)         | 0.2191          | 3.8720          | 0.0888  |              |
|         | MG(+) x MG(-) | 0.4238          | 7.4896          | 0.0002  | ***          |
| MG(-)   | MG(+) x MG(-) | 0.2047          | 3.6176          | 0.1308  |              |

The significance between each of the groups was calculated as a *P* value. \*\**P* < 0.01; \*\*\**P* < 0.001.
