# Supplementary material
Source: PubMed Central journal article supplement (PMC3527255)
Supplement: 810f840197a898c420e8afe2fbf23383_genetics.112.144402-10.pdf [file 810f840197a898c420e8afe2fbf23383_genetics.112.144402-10.pdf]

**Table S2 List of transgenic lines obtained**

| Vector                                     | Injected embryos <sup>a</sup> | Hatched embryos | Fertile moths <sup>b</sup> | G <sub>1</sub> broods with GFP/DsRed positive larvae <sup>c</sup> | Percent G <sub>0</sub> transformed moths | Name of the transgenic lines                         |
|--------------------------------------------|-------------------------------|-----------------|----------------------------|-------------------------------------------------------------------|------------------------------------------|------------------------------------------------------|
| <i>pPiggyMG(+)</i><br><i>3XP3-GFP</i>      | 800                           | 618             | 550                        | 6                                                                 | 1.1                                      | 2G, 58L, 244E                                        |
| <i>pPiggyMG(-)</i><br><i>3XP3-DsRed2</i>   | 1380                          | 806             | 508                        | 6                                                                 | 1.2                                      | 126C, 239A                                           |
| <i>pPiggyMG(+/-)</i><br><i>3XP3-DsRed2</i> | 1500                          | 821             | 600                        | 8                                                                 | 1.3                                      | 118A, 118B, 154C,<br>154D, 164B, 164C,<br>170A, 170B |

<sup>a</sup>*B. mori* eggs were injected with a mixture of *pHA3PIG* and sense, antisense or MG(+/-) constructs

<sup>b</sup>Hatched larvae (G<sub>0</sub>) were allowed to develop to moths

<sup>c</sup>The moths were intercrossed and the resulting G<sub>1</sub> broods were screened for GFP/DsRed expression
