# Supplementary material
Source: PubMed Central journal article supplement (PMC3527255)
Supplement: 76370584c252a8256570a54e78a6acb1_genetics.112.144402-9.pdf [file 76370584c252a8256570a54e78a6acb1_genetics.112.144402-9.pdf]

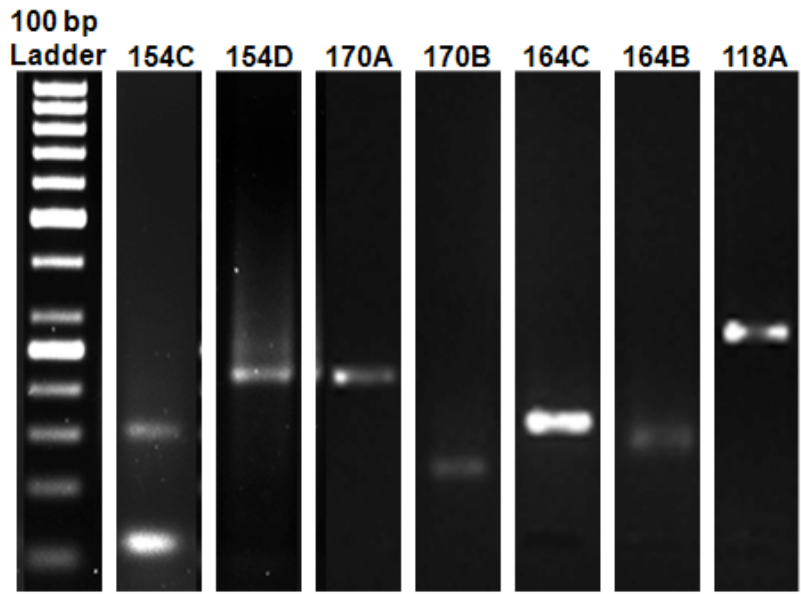

**Figure S2** Copy number and site of insertion of transgenes in transgenic lines were characterized using TED assay. Seven Nistari transgenic lines (MG(+/-) 170A, 170B, 164C, 164B, 154C, 154D and 118A) showed single copy insertions.
