# Supplementary material
Source: PubMed Central journal article supplement (PMC3527255)
Supplement: d70aaa96bdda0306a3e0b7d521a24c7a_genetics.112.144402-3.pdf [file d70aaa96bdda0306a3e0b7d521a24c7a_genetics.112.144402-3.pdf]

**Table S3 Location of insertion of transgenes**

| Transgenic Line | Accession Number | Description                                                              |
|-----------------|------------------|--------------------------------------------------------------------------|
| MG(+/-)118A     | BAAB01060705.1   | <i>Bombyx mori</i> DNA, contig26425, whole genome shotgun sequence       |
| MG(+/-)164C     | AADK01013361.1   | <i>Bombyx mori</i> strain Dazao Ctg013361, whole genome shotgun sequence |
| MG(+/-)164B     | AADK01013361.1   | <i>Bombyx mori</i> strain Dazao Ctg013361, whole genome shotgun sequence |
| MG(+/-)170A     | X58446.1         | <i>Bombyx mori</i> ErA.3 gene for chorion protein                        |
| MG(+/-)170B     | AADK01004442.1   | <i>Bombyx mori</i> strain Dazao Ctg004442, whole genome shotgun sequence |
