# Supplementary material
Source: PubMed Central journal article supplement (PMC3527255)
Supplement: db076f19d8a0ac14c858ec59df7520c9_genetics.112.144402-12.pdf [file db076f19d8a0ac14c858ec59df7520c9_genetics.112.144402-12.pdf]

Cloning of baculoviral genes (*ie1*, *lef1*, *lef3* and *p74*) into TOPO vector

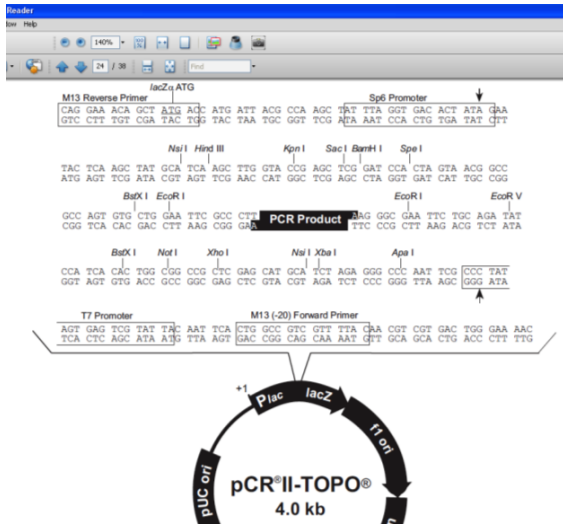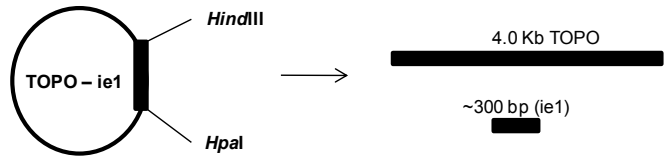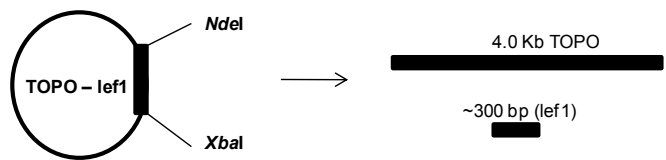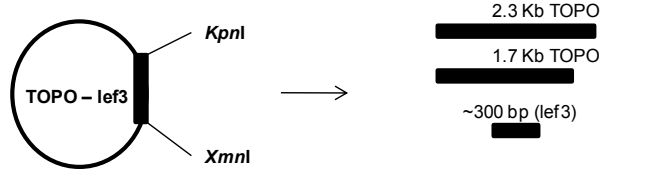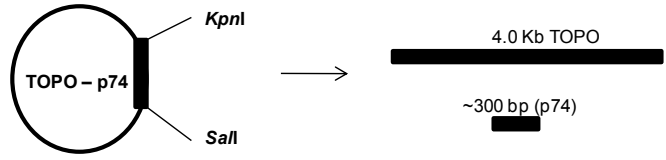

Step 1

A 316 bp fragment of *lef3* was cloned into pA3DS-FSG vector backbone using *Sall* and *NheI* sites to generate 1-gene construct, pA3Δ*lef3*

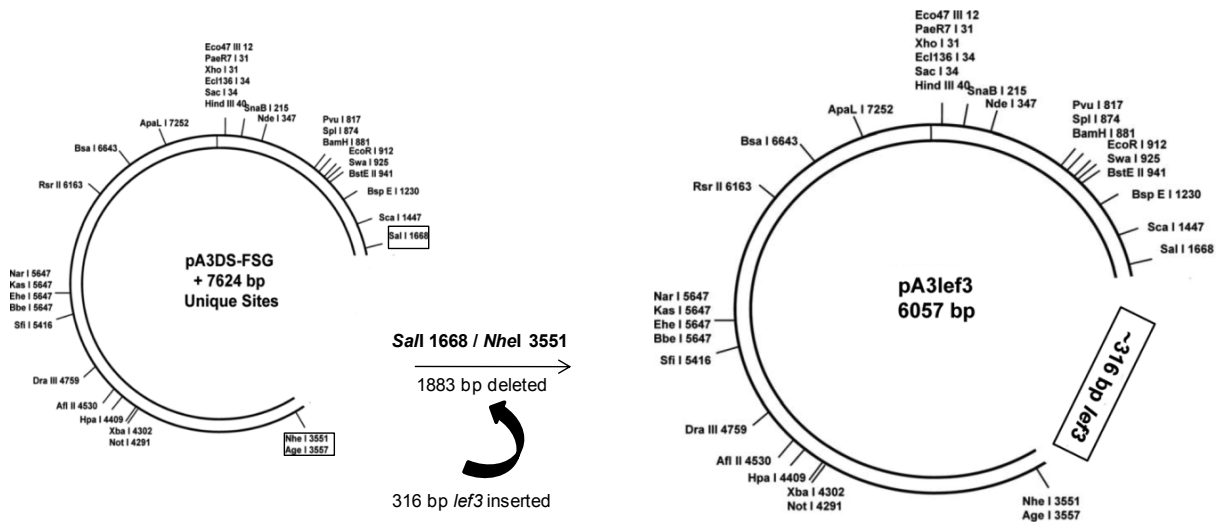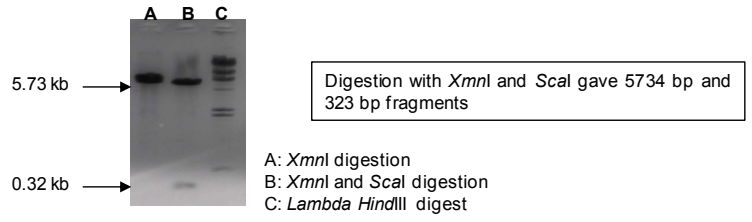

Step 2

A 310 bp fragment of *ie1* was cloned into pA3 $\Delta$ lef3 vector backbone using *Bsp*E1 and *Sal*I sites to generate 2-gene construct, pA3 $\Delta$ ie1lef3

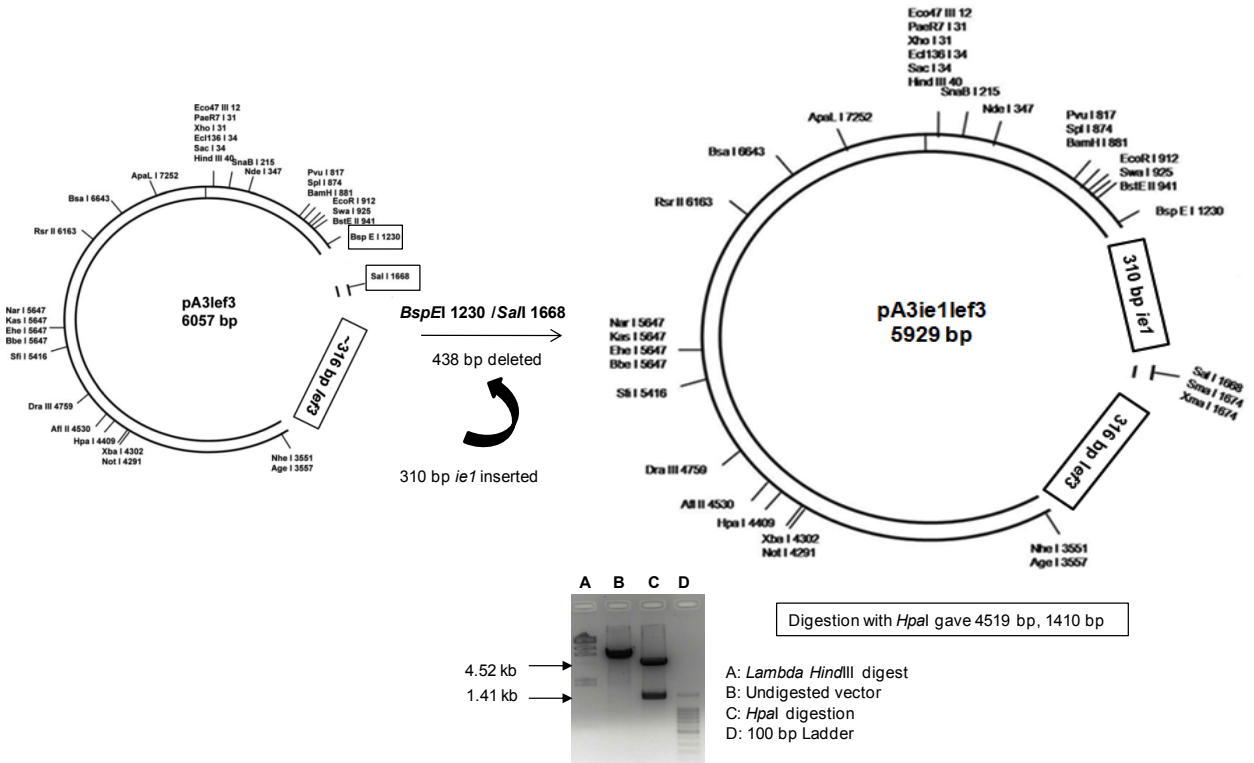

Step 3

A 800 bp fragment of *gfp* was cloned into pA3 $\Delta$ ie1ef3 vector backbone using *PvuI* and *BamHI* sites to generate 3-gene construct, pA3gfpie1ef3

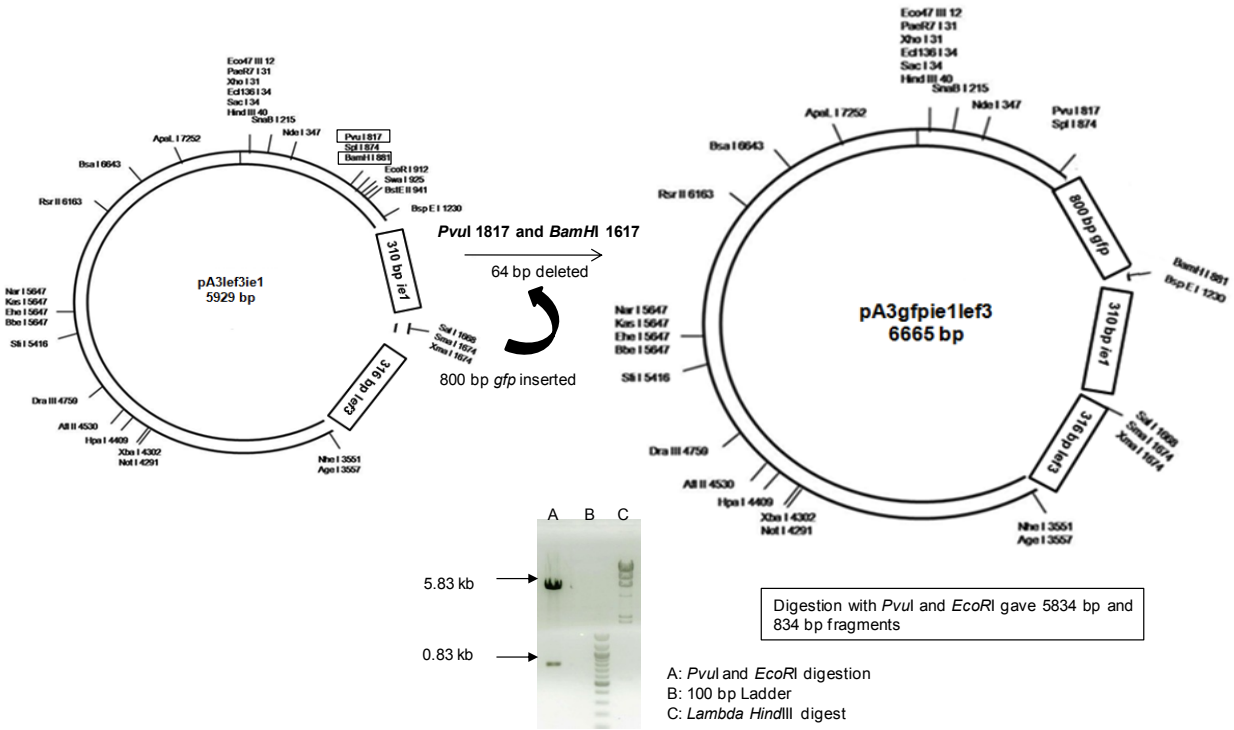

A 326 bp fragment of *lef1* was cloned into pA3Δgfpie1lef3 vector backbone using *Bam*HI and *Bsp*EI sites to generate 4-gene construct, pA3Δgfp1ef1lef3

Step 4

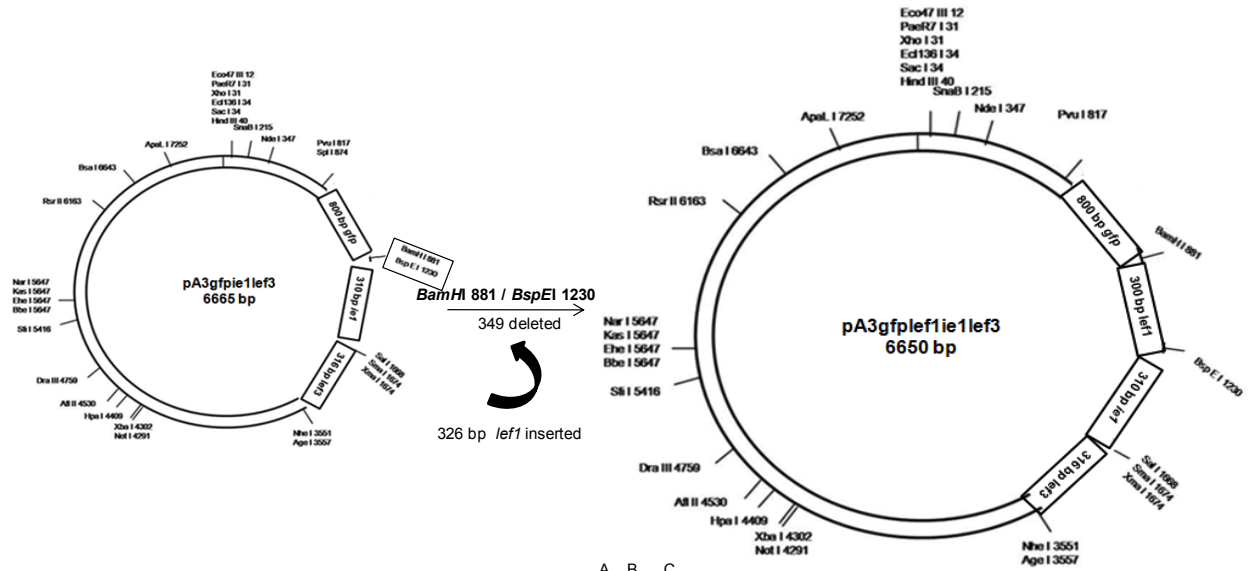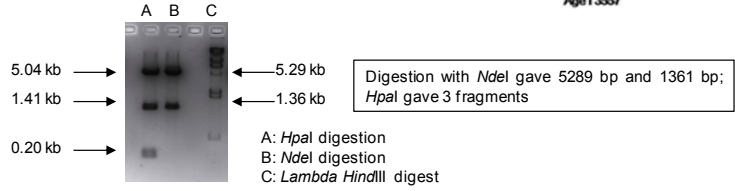

Step 5

A 310 bp fragment of *p74* was cloned into pA3Δ*gfplef1ie1lef3* vector backbone using *AgeI* and *XbaI* sites to generate 5-gene construct, pA3Δ*gfplef1ie1lef3p74*

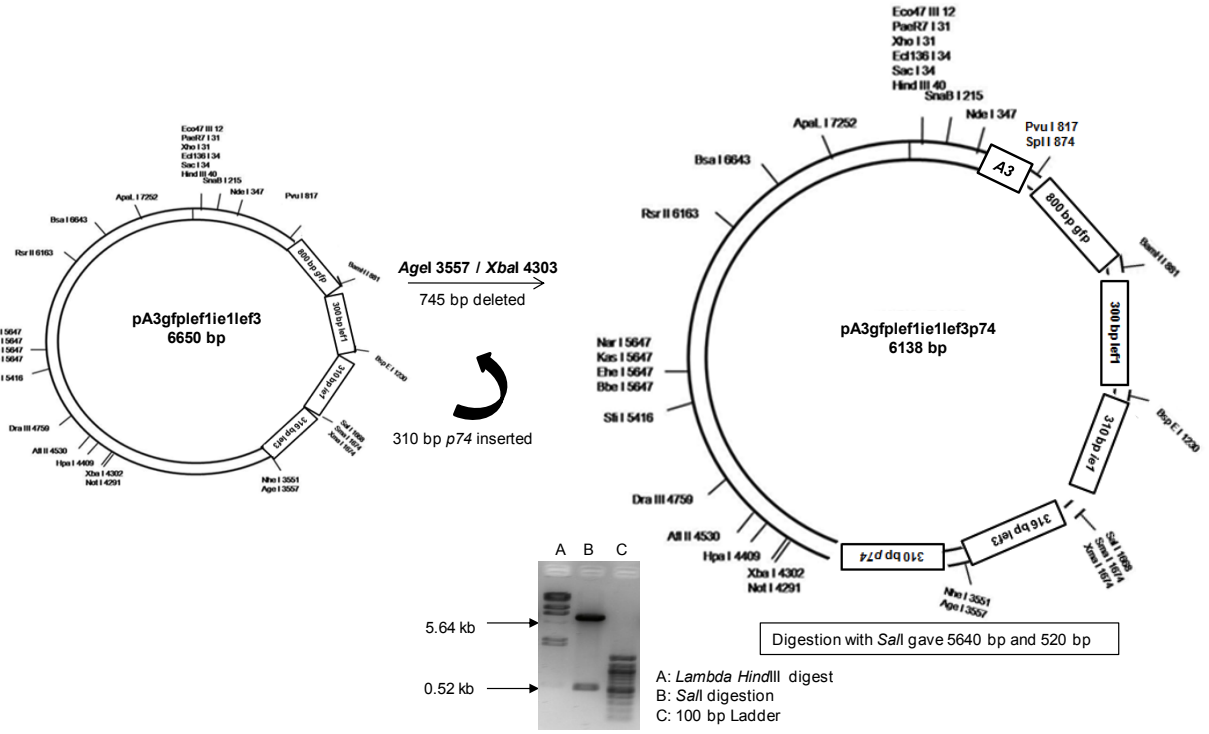

Step 6

1994 bp 5-gene sense fragment cloned to pP25(sp\*)DsRed vector backbone using *Bg*/II and *Age*I sites to generate pP25(sp\*)DsRed-A3ΔSsens-Spacer

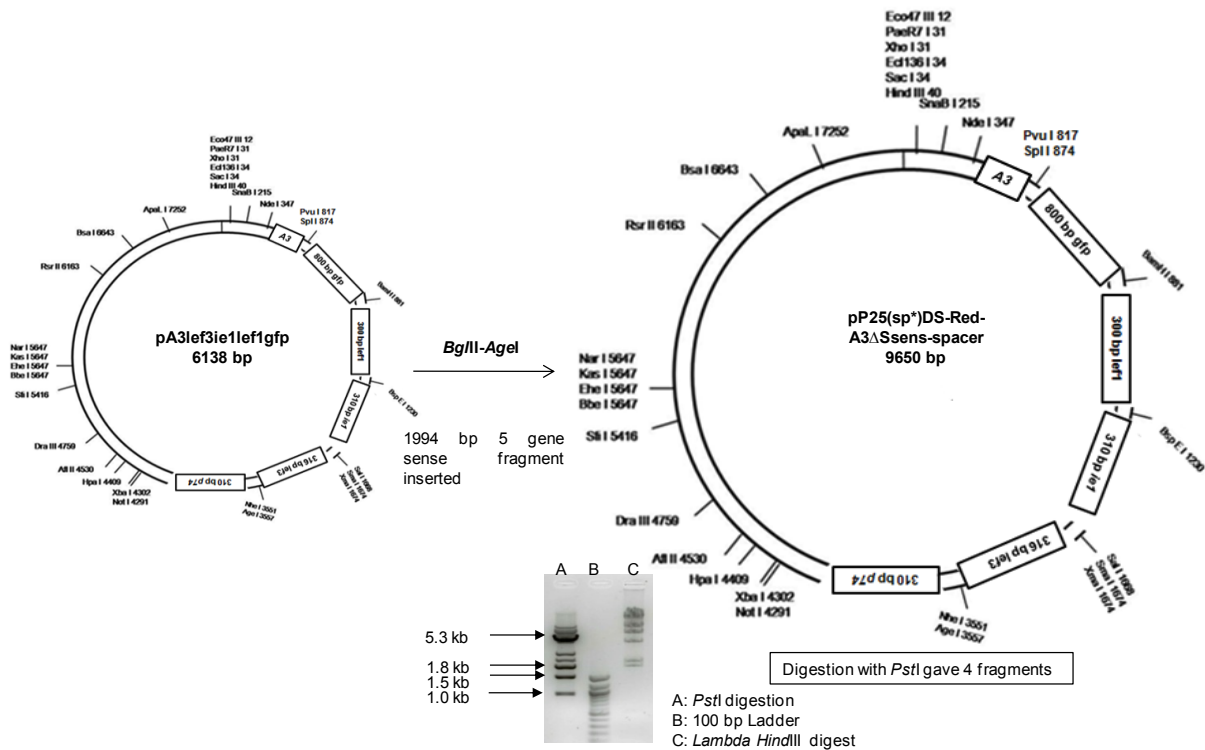

Step 7

Antisense fragment of five genes was cloned into intermediary form of sense-spacer vector backbone using *Afl*II – *Sse*8337I sites to generate pP25(sp\*)DsRed-A3ΔS Sense.Spacer.Antisense-Poly A region

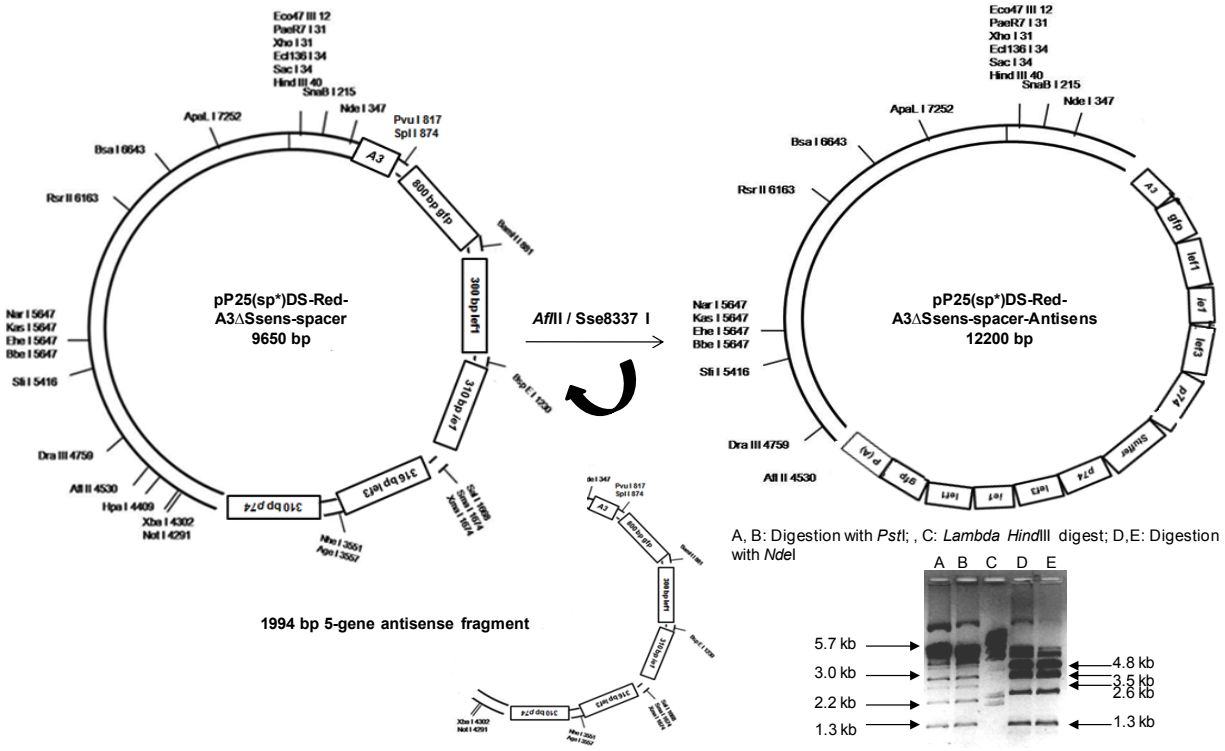



Step 8

pP25(sp\*)DsRed-A3ΔSSense.Spacer.Antisense-Poly A construct and PiggyP25IL2-(3xP3 DsRed2) TQ backbone vector were digested using *Bgl*II – *Sfi*I sites to generate PiggyA3ΔSSense-Spacer-Antisense(3xP3.DsRed2) multiple flip-flop piggyBac vector

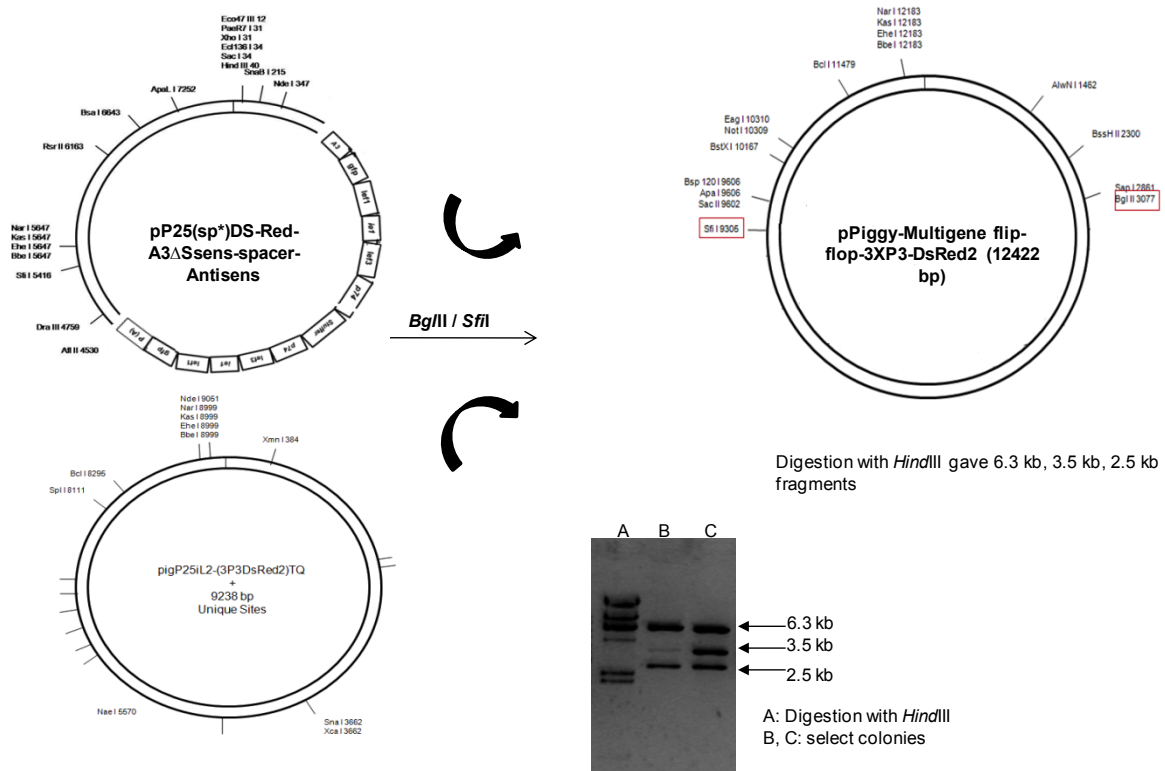

**Figure S1** The four baculoviral genes *ie1*, *lef1*, *lef3* and *p74* were initially cloned into pCRII TOPO vector (Invitrogen). The resultant plasmids were labeled as *Topo-ie1*, *Topo-lef1*, *Topo-lef3*, and *Topo-p74*. These vectors having right inserts were confirmed by restriction digestions and DNA sequencing for later use in cloning steps. The various steps involved in the construction of *pPiggyMG(+)*3XP3-GFP, *pPiggyMG(-)*3XP3-DsRed2 and *pPiggyMG(+/-)*3XP3-DsRed2 were schematically represented. The stepwise description is provided in the text.

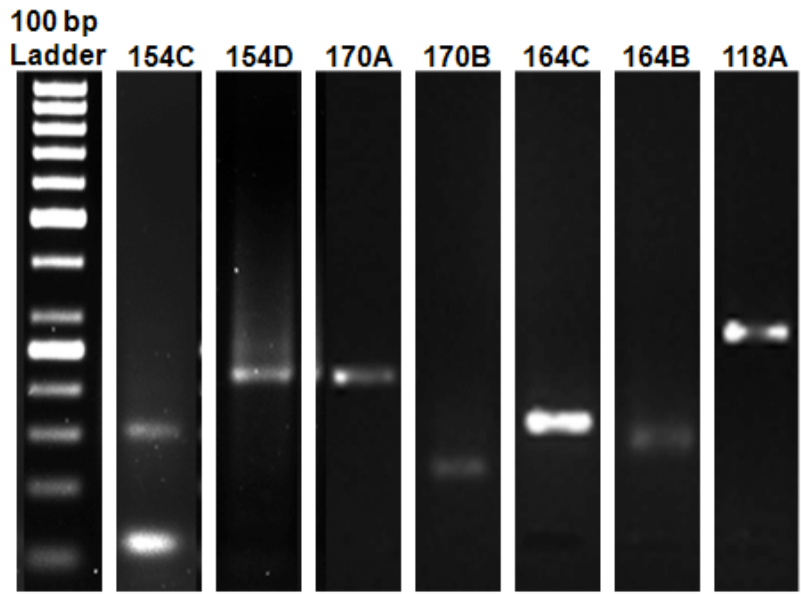

**Figure S2** Copy number and site of insertion of transgenes in transgenic lines were characterized using TED assay. Seven Nistari transgenic lines (MG(+/-) 170A, 170B, 164C, 164B, 154C, 154D and 118A) showed single copy insertions.

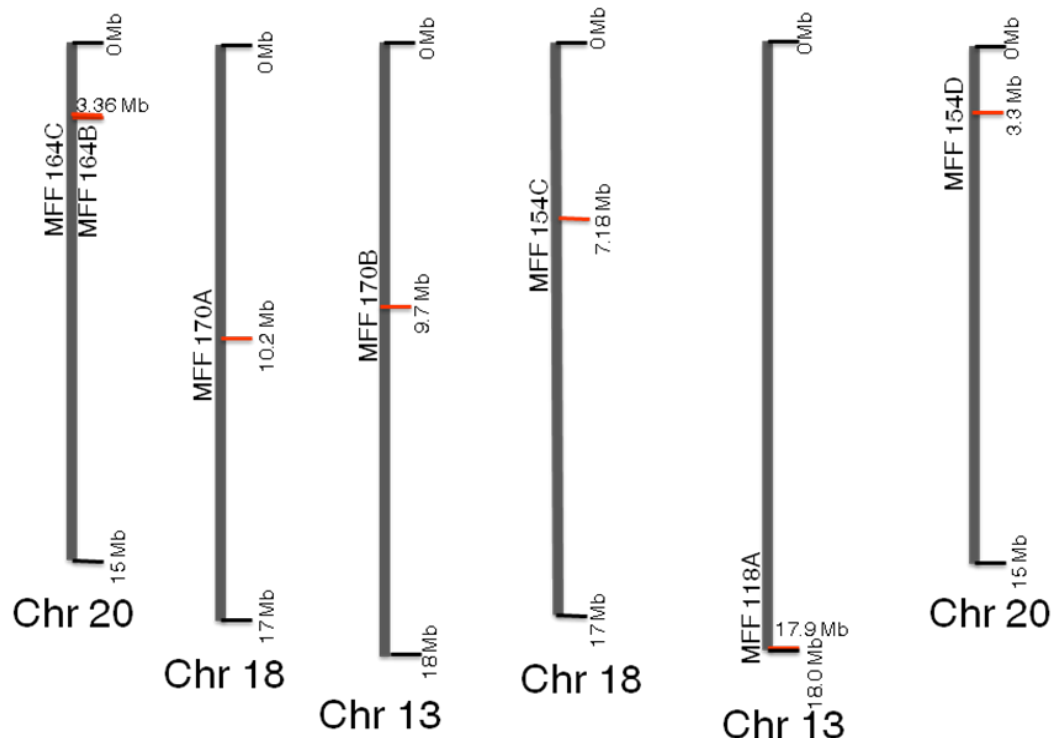

**Figure S3** Mapping of transgenes to chromosome locations in different transgenic lines expressing dsRNA for essential baculoviral genes.

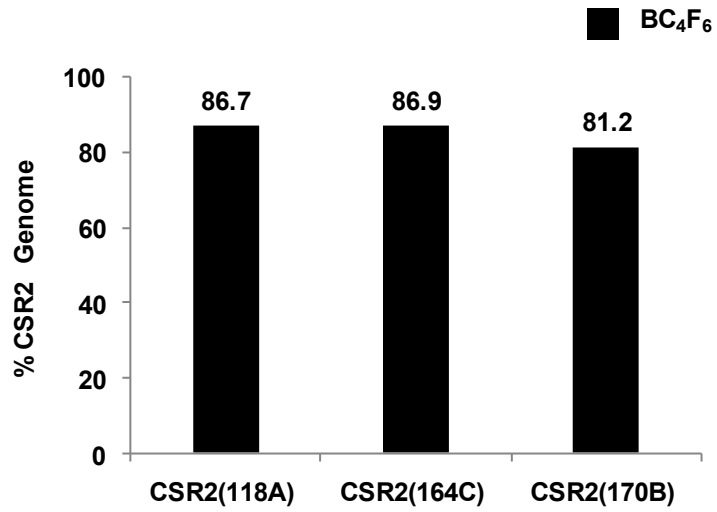

**Figure S4** Histogram representing percentage incorporation of the CSR2 genome in the BC<sub>4</sub>F<sub>6</sub> population of transgenic lines, CSR2(118A), CSR2(164C) and CSR2(170B) obtained through recurrent backcross strategy, as measured by CSR2-specific SSR alleles from 10 loci.

## File S1

### ADDITIONAL METHODS

**Construction of the vectors:** The vectors were constructed by amplifying the portions of *ie1*, *lef1*, *lef3* and *p74* genes encoding the *immediate early 1* gene, late expression factors 1, 3 and envelope protein of BmNPV, respectively, using primers carrying specific restriction enzyme sites. Similarly, *gfp* gene of pPIGA3GFP (Kanginakudru *et al.* 2007) was amplified. The primers used for the amplification of the genes are listed in the TABLE S1. The amplicons were cloned into the T-overhangs of pCRII TOPO vector (Invitrogen) (FIGURE S1). The resultant plasmids were labeled as Topo-*ie1*, Topo-*lef1*, Topo-*lef3*, Topo-*p74* and Topo-*gfp*. The targeted regions of *ie1*, *lef1*, *lef3*, and *p74* are as mentioned in File S2. These vectors having right inserts were confirmed by restriction digestions and DNA sequencing. These baculoviral genes produce virus specific proteins and do not share any homology to known insect or human genes.

The pTopo clones were transformed into one shot INV110 chemically competent *E. coli* cells (Invitrogen). Blue/White screening was performed on LB agar plates containing 40 µl of X-Gal (40 mg/ml) and 40 µl of isopropyl β-D-thiogalactoside (IPTG, 100 mM). White colonies were picked up for insert analysis through digestion. Colonies that gave right inserts of expected size were picked up. For DNA sequencing, 250 ng of plasmid was used in a sequencing reaction that contained 8 µl of Ready reaction mix (BigDye terminator, BDTv 3.0, Applied Biosystems, Foster City, CA) and 5 picomoles of M13 sequencing primers. The cycling conditions used were as follows: 25 cycles of 96°C for 10 sec, 50°C 5 sec, 60°C 4 min. Samples were ethanol precipitated, washed with 70% ethanol and resuspended in Hi-Di™ formamide (Applied Biosystems). The sequencing was carried out in ABI Prism 3100 Genetic Analyzer (Applied Biosystems) and the intactness of each gene fragment was confirmed. The constructs were obtained in a series of cloning steps as described below:

1. A 316 bp fragment of *lef-3* was cloned into pA3DS-FSG vector backbone (7624 bp) using *Sall-NheI* sites to generate single gene construct, pA3ΔS-lef3 (6057 bp). The transformants were verified by *XmnI* (an internal site of *lef3*) restriction digestion and *XmnI/Scal* double digestion. *XmnI* digestion linearizes to 6.05 kb fragment of 1-gene construct and double digestion with *Scal* (a site in backbone) released 323 bp product or insert size and 5.73 kb fragment as per DNA strider map pattern.
2. A 310 bp fragment of *ie-1* was cloned in to pA3ΔS-lef3 vector using *BspEI-Sall* sites to generate pA3ΔS-ie1lef3SG, a two gene construct (5929 bp). The transformants were checked upon sequential digestion using *XmnI/HpaI* restriction system. *XmnI* linearization of 2-gene construct gave rise to 5929 bp fragment and *XmnI/HpaI* sequential digestion gave rise to expected three bands of 339 bp, 1071 bp and 4519 bp fragments.

3. An 800 bp fragment of *gfp* was cloned into pA3ΔS-ie1lef3 vector backbone using *PvuI*-*Bam*HI sites to generate pA3ΔS-gfpie1lef3, a three gene construct (6665 bp). The transformants were checked upon *PvuI*/*Eco*RI restriction analysis which gave rise to 834 bp insert and 5834 bp backbone.

4. A 326 bp *lef-1* clone was added to pA3ΔS-gfpie1lef3 vector backbone using *Bsp*El/*Bam*HI to generate pA3ΔS-gfplef1ie1lef3 (6650 bp) a four gene product. The transformants were confirmed through *Hpa*I and *Nde*I restriction digestions which gave rise to 3 fragments of expected lengths 188 bp, 1410 bp, 5040 bp and 2 fragments of expected length 1361 bp and 5289 bp, respectively.

5. A 310 bp fragment of *p74* was cloned in to pA3ΔS-gfplef1ie1lef3 vector backbone using *Age*I-*Xba*I sites to generate a five gene construct, pA3ΔS-gfple1ie1lef3p74 (6160 bp). The transformants were confirmed through *Sal*I restriction digestion. It gave rise to 520 bp insert and 5640 bp backbone.

The five gene sense oriented construct, pA3ΔS-gfplef1ie1lef3p74 was digested with internal *Nhe*I-*Xba*I sites to generate sense and antisense oriented pool of fragment of five genes. Transformants were screened for antisense oriented plasmids. This was confirmed by *Hind*III/*Xmn*I digestion, wherein the antisense colony gave rise to 1.3 kb fragment whereas sense oriented colony gave rise to 2.2 kb fragment.

Sense construct - The A3:*gfp* fused promoter along with four genes and poly A tail were cloned into *pPiggyP25il2-(3XP3-GFP)TQ* using *Bgl*II-*Nhe*I and *Bgl*II-*Xba*I sites to generate *pPiggyMG(+)*3XP3-GFP vector (FIGURE 1).

Antisense construct - The antisense fragment obtained as mentioned above was cloned into *pPiggyP25il2-(3XP3-DsRed2)TQ* to generate *pPiggyMG(-)*3XP3-DsRed2 vector (FIGURE 1).

6. Inverted Repeat Construct - The above A3:*gfp* fused promoter along with four genes was cloned into pP25(sp\*)DsRed vector backbone using *Bgl*II-*Age*I sites to generate sense fragment with spacer region, an intermediary vector form pP25(sp\*)DsRed-A3ΔS Sense.Spacer.

7. The antisense fragment of five genes was cloned into intermediary form of sense-spacer vector backbone using *Sse*8337I-*Afl*III sites to generate flip-flop form of multigene construct, pP25(sp\*)DsRed-A3ΔS Sense.Spacer.Antisense.Poly A region.

8. The intermediary shuttle vector, pP25(sp\*)Sense-Spacer-Antisense vector was digested with *Bgl*II and *Sfi*I sites to generate inverted repeat. This insert was cloned into *PiggyP25IL2-(3XP3-DsRed2)TQ* using *Bgl*II/*Sfi*I sites to generate *pPiggyA3gfplef1ie1lef3p74.spacer.p74lef3ie1lef1gfp.3XP3-DsRed2* (*pPiggyMG(+/-)*3XP3-DsRed2) vector with *DsRed2* as the selection marker gene (FIGURE 1).

**Polymerase Chain Reaction:** A typical PCR reaction consisted of 20 µl final volume with 5 pmol each of forward and reverse primers. The PCR amplification was performed in 10 mM Tris-HCl, (pH 8.3 containing 50 mM KCl, 1.5 mM MgCl<sub>2</sub>, 0.01% gelatin and 0.01% Triton X-100), 1 mM dNTPs and 0.5 U of *Taq* DNA Polymerase (NEB, UK) per reaction. Thermal cycling was carried out in a thermal cycler (PE9700, Applied Biosystems) using the following conditions: initial denaturation of 3 min at 95°C; 35 cycles of 30 sec at 94°C; 30 s at 52°C (as per the *T<sub>m</sub>* of the respective gene) and 2 min at 72°C, and final extension of 10 min at 72°C. The PCR products were quantified on agarose gel, purified using Qiagen PCR purification columns, according to the manufacturer's protocol.

File S2

Sequence of the selected viral genes

1. The entire *ie1* of BmNPV is 1755 bp, the targeted region is 141 – 450 bp (310 bp)

***ie1* (Accession Number L33180)**

TGGAGCCGACACGGTAGTATCTGACAGCGAGACTGCAGCAGCTTCAAACCTTTTGGCAAGCGTCAATTCGTTAACTGATGATAACGAT  
ATAATGGAATGTTTGCTCAAGACCACTGATAATCTCGGAGAAGCAGTTAGTTCTGCTTATTATTCGGAATCCCTTGAGCTGCCTGTTGC  
GGAGCAACCATCGCCAGTTCTGCTTATAATGCGGAATCTTTGAGCAGTCTGTTGGTGTGAACCAACCATCGGCAGCTGGAACATAAC  
GGAAGCTGGACGAATACTTGGACGATTCAAAAGTGTGGTGGGC

2. The entire *lef1* of BmNPV is 813 bp, the targeted region is 80 – 405 bp (326 bp)

***lef1* (Accession Number L33180):**

GTCACCGACCACATCCACCAATCCATAACCAGGATAGCATTGCTTTAATTTGTCTAGCAATTCCTTTGTTATACAACGAGAAAATTTAGTTC  
CCTTATAATTATAGCTGTACGGTGCGGTATTTGTTGTTAACGTTACAAAAATATCCCTGTCCACGTCCGGCCAATACTGCAACGTGAGCGC  
GTCCAAGTTTGAATCTTGCATATGCGGAATGTACAAACGTACGGCCTCTCTCACACAATGCGCAAAACTGCCGGCTGAATGCAATCACTATC  
CAACTTTCAGGTTTTTCGAAGGCCTTGTACCGATGCACGCGAAC

3. The entire *lef3* of BmNPV is 1158 bp, the targeted region is 391 – 706 bp (316 bp)

***lef3* (Accession Number L33180):**

TCTTGCCTTTGTGCAATTTGCAAATTTGAATAGGCTTCGTTTTCTTTAGCCTCGCACAATTCGATGCGCGTAGAGTTGACCACGTTCCAATCA  
TGACACGTTTGTCCATTGAAAATTTGTTGACATTTTATATTGTAATGGTAAAGATTTGGTTTTTATTGCTTTTAAATATTTAAACACCTCAT  
TGATGTCGTCAGACCCCTTATATTGTTTTGAATAGATTCATCAGTGTTTTCGCATTGACAAAACATTCACCTTGAACCACGTCGGAATCGTC  
GTTAAAATTTTGTACGCGACTTCAAAAACA

4. The entire *p74* of BmNPV is 1938 bp, the targeted region is 1243 – 1552 bp (310 bp)

***p74* (Accession Number L33180):**

GTTGGCCAGCATTTTGAAAGTGACAAGAATCGTGTGCGCCAGCACGAATCCGACGAGCGATTCCCACCATCTAAACGAACAGCCGCCGTTGA  
ATAGATTTCTGCCGAATCGTCGACAGTAGGCTTCGTTGAATTCGCCTTTAAAGCGTTCCGGGAAACAAGGGATCGGGATCGGGCCGAACGTTA  
AAAGCCGGCACATCGTCCACGCCCATGATCGTGTGTTCTCGGTGCGCAAGTATGGGCTGTTAAAGTACATTTTGGACAGCGAGTCCACCAA  
GATGCATCTGTTGTCGGGCGTGTATCTAAACTCG



File S3

Genomic DNA sequences of different MG(+/-) transgenic lines surrounding *piggyBac* insertions, with the **TTAA** duplicated sequence appearing at all 5' and 3' insert boundaries. TTAA sequences which are characteristic of *piggyBac* mediated transposition are shown in red colour.

MG(+/-)118A

ACTATCTTTCTAGGG**TTAA**TGATTGAATGCAAACATCAGCGATATGAGAGTAACAAATCAGCTTTAGCGATAAACCTCTACAAGAACAAACGA  
ACTACAATAGGTACTTATTATGTTTTAATAAACTTTTATTATCTTCACACGTTTATTACTATGTATGTATGTNACGGAACTTTGAACATGATTT  
TCACCCCTTCAAACGTCGGACTAACTCAAATTTGGCATACGTATTATGATTGATGACAATTCAATATTTAATCAGTTAGATCCAAGGAG  
AGGACAGCGATTCTCGTACANACGGTCGCG

MG(+/-)154C

ATGCATGCGTCAATTTTACGCAGACTATCTTTCTAGGG**TTAA**GCAAAGCGGACGTGCGGGCCACAATAGTCGTGCTCATAAAATTTGTGGG  
TAGATAGTATATGGCACGATCCAAGGCGAGGACGGCGATTTC

MG(+/-)154D

AGCGATATTTCAAGCATGCATGCGTCAATTTTACGCAGACTATCTTTCTAGGG**TTAA**GCGAGAAGCGGACGTGCGGGCCACAATAGTCGTGCTC  
ATACAAATTTGTGGGTAGATAGTATATGGCACGATCCAAGGCGAGGACCGCGATTCTCGTACAAGGGGGGGG

MG(+/-)164B

GGGCGTTTCGCGCTATTTGGAAAGAGAGAGCAATTTCAAGAATGCATGCGTCAATTTTACGCAGGACTATCTTTCTAGGG**TTAA**GCAAAA  
GCGGACGTGCGGGCCACAATAGTCGTGCTCATAAAATTTGTGGGTAGATAGTTATATGTCACGATCCAAGGAGAGGACAGCGATTCTCGTA  
CACGAGGACAGCGATTCTCGTACAC

MG(+/-)164C

TCGCGCTATTTGGAAAGAGAGAGCAATTTTCAAGAATGCATGCGTCAATTTTACGCAGACTATCTTTCTAGGG**TTAA**GCAAAGCGGACGT  
GCGGGCCACAATAGTCGTGCTCATAAAATTTGTGGGTAGATAGTTATATGTCACGATCCAAGGAGAGGACAGCGATTCTCGTACAACGGT  
TACGATTCGAGAAGGG

MG(+/-)170A

ATTCAGAATGCATGCGTCATTTTACGCAGACTATCTTTCTAGGGTTAAATAAAATATGTAAATGAACAAAAACCGAATCCGAGTTTTTCAGT  
ACAAATCGGCAATTCATACTTTAACCCCTTATATTATCGTTACGATAATACATTTATATATAGCAATTATTATAAAATACTAAAATATCTTCAAC  
AAAATTTACTTACAGAAATCAATCGAAAACATATTTCTTTAGATCCAAGGAGAGGACAGCGGATTCTCGTACAGCCGGCGGCGATTTCGTGAA  
GGG

MG(+/-)170B

CGGGCGGATTGCGCTATTTAGAAAAGAGAGAGCAATATTTCAAGNAATGCATGCGTCAATTTTACGCAGACTATCTTTCTAGGGTTAAATAAGC  
GTGTTACGTTTTGGACATGTTTTGCACTGAAACGAGATCCAAGGAGAGGACAGCGATTCTCGTACAAACGGTTACGATTTCGAGAAGGGAG  
AG

**Table S1 PCR primers used for amplification of the different indicated genes/constructs**

| Gene/construct      | Sequence 5' to 3'                     |
|---------------------|---------------------------------------|
| <i>gfp</i> F        | ATCGATCGCTAGCCCCGGGATGGTGAGCAAGGGCGAG |
| <i>gfp</i> R        | CGCGGATCCTTACTTGTACAGCTCGTCCA         |
| <i>3XP3GFP</i> F    | CCGAATTCAGATCTTCCACAATGGTTAATTCGAGCTC |
| <i>3XP3GFP</i> R    | CCGGATCCGCCGGCGTACGCGTATCGATAAGCTTTA  |
| <i>DsRed</i> F      | CAAGATCTAATTCGAGCTCGCCCCGGGATCTAATTC  |
| <i>DsRed</i> R      | TAGCAGATCTGTACGCGTATCGATAAGCTTTAAG    |
| <i>ie1</i> gene F   | CGCTCCGGAGCCGACACGGTAGTATC            |
| <i>ie1</i> gene R   | ACGCGTCGACGCCACCACACTTTGTGAAT         |
| <i>lef1</i> gene F  | CGCGGATCCGGTACAAGGCCTTCGAAA           |
| <i>lef1</i> gene R  | CCGTCCGGACCGACCACATCCACCAA TTCCAT     |
| <i>lef3</i> gene F  | ACGCGTCGACTTGTTTTTGAAGTCGCGTACA       |
| <i>lef3</i> gene R  | TGCTCTAGACTTGCGTTTGTGCAATTTTGCA       |
| <i>p74</i> gene F   | TCCCCCGGGTAGATACACGCCGACAACA          |
| <i>p74</i> gene R   | TGCTCTAGACTGCAGGACCGTTGGCCAGCATTGAA   |
| Viral <i>lef3</i> F | GGAGGAAGGCAAGTGCTATG                  |
| Viral <i>lef3</i> R | CTCAGGGGGATTGCAGTTT                   |
| 18S rRNA F          | CGATCCGCCGACGTTACTACA                 |
| 18S rRNA R          | GTCCGGGCCTGGTGAGATTT                  |

F – Forward; R - Reverse

**Table S2 List of transgenic lines obtained**

| Vector                                     | Injected embryos <sup>a</sup> | Hatched embryos | Fertile moths <sup>b</sup> | G <sub>1</sub> broods with GFP/DsRed positive larvae <sup>c</sup> | Percent G <sub>0</sub> transformed moths | Name of the transgenic lines                         |
|--------------------------------------------|-------------------------------|-----------------|----------------------------|-------------------------------------------------------------------|------------------------------------------|------------------------------------------------------|
| <i>pPiggyMG(+)</i><br><i>3XP3-GFP</i>      | 800                           | 618             | 550                        | 6                                                                 | 1.1                                      | 2G, 58L, 244E                                        |
| <i>pPiggyMG(-)</i><br><i>3XP3-DsRed2</i>   | 1380                          | 806             | 508                        | 6                                                                 | 1.2                                      | 126C, 239A                                           |
| <i>pPiggyMG(+/-)</i><br><i>3XP3-DsRed2</i> | 1500                          | 821             | 600                        | 8                                                                 | 1.3                                      | 118A, 118B, 154C,<br>154D, 164B, 164C,<br>170A, 170B |

<sup>a</sup>*B. mori* eggs were injected with a mixture of *pHA3PIG* and sense, antisense or MG(+/-) constructs

<sup>b</sup>Hatched larvae (G<sub>0</sub>) were allowed to develop to moths

<sup>c</sup>The moths were intercrossed and the resulting G<sub>1</sub> broods were screened for GFP/DsRed expression

**Table S3 Location of insertion of transgenes**

| Transgenic Line | Accession Number | Description                                                              |
|-----------------|------------------|--------------------------------------------------------------------------|
| MG(+/-)118A     | BAAB01060705.1   | <i>Bombyx mori</i> DNA, contig26425, whole genome shotgun sequence       |
| MG(+/-)164C     | AADK01013361.1   | <i>Bombyx mori</i> strain Dazao Ctg013361, whole genome shotgun sequence |
| MG(+/-)164B     | AADK01013361.1   | <i>Bombyx mori</i> strain Dazao Ctg013361, whole genome shotgun sequence |
| MG(+/-)170A     | X58446.1         | <i>Bombyx mori</i> ErA.3 gene for chorion protein                        |
| MG(+/-)170B     | AADK01004442.1   | <i>Bombyx mori</i> strain Dazao Ctg004442, whole genome shotgun sequence |

**Table S4** Pairwise comparisons using Tukey HSD among groups on percentage mortality (values arcsin transformed) in transgenic lines, and their hybrids with CSR2 upon BmNPV treatment done after post-hoc analysis of the corresponding treatment factor using main effects in a one-way ANOVA.

| Lines                              | Mean Difference | Test Statistics | P level | Significance |     |
|------------------------------------|-----------------|-----------------|---------|--------------|-----|
| Transgenic lines                   |                 |                 |         |              |     |
| Control                            | IE              | 17.6925         | 7.8087  | 0.0001       | *** |
|                                    | MG(+/-)         | 41.0488         | 18.1171 | 0.0001       | *** |
|                                    | MG(+)           | 19.7788         | 8.7295  | 0.0001       | *** |
|                                    | MG(-)           | 26.6300         | 11.7533 | 0.0001       | *** |
|                                    | MG(+) x MG(-)   | 32.2100         | 14.2160 | 0.0001       | *** |
| IE                                 | MG(+/-)         | 23.3563         | 10.3084 | 0.0001       | *** |
|                                    | MG(+)           | 2.0863          | 0.9208  | 0.9863       |     |
|                                    | MG(-)           | 8.9375          | 3.9446  | 0.0791       |     |
|                                    | MG(+) x MG(-)   | 14.5175         | 6.4074  | 0.0007       | *** |
| MG(+/-)                            | MG(+)           | -21.2700        | 9.3876  | 0.0001       | *** |
|                                    | MG(-)           | -14.4188        | 6.3638  | 0.0008       | *** |
|                                    | MG(+) x MG(-)   | -8.8388         | 3.9010  | 0.0848       |     |
| MG(+)                              | MG(-)           | 6.8512          | 3.0238  | 0.2882       |     |
|                                    | MG(+) x MG(-)   | 12.4313         | 5.4866  | 0.0047       | **  |
| MG(-)                              | MG(+) x MG(-)   | 5.5800          | 2.4628  | 0.5132       |     |
| Hybrids of transgenic lines x CSR2 |                 |                 |         |              |     |
| Control x CSR2                     | IE x CSR2       | 21.5750         | 7.7516  | 0.0002       | *** |
|                                    | MG(+/-) x CSR2  | 38.8650         | 13.9637 | 0.0001       | *** |

|                |                      |          |        |        |     |
|----------------|----------------------|----------|--------|--------|-----|
|                | MG(+) x CSR2         | 14.9100  | 5.3570 | 0.0082 | **  |
|                | MG(-) x CSR2         | 21.6433  | 7.7762 | 0.0002 | *** |
|                | MG(+) x MG(-) x CSR2 | 27.6317  | 9.9277 | 0.0001 | *** |
| IE x CSR2      | MG(+/-) x CSR2       | 17.2900  | 6.2121 | 0.0017 | **  |
|                | MG(+) x CSR2         | -6.6650  | 2.3946 | 0.5465 |     |
|                | MG(-) x CSR2         | 0.0683   | 0.0246 | 1.0000 |     |
|                | MG(+) x MG(-) x CSR2 | 6.0567   | 2.1761 | 0.6431 |     |
| MG(+/-) x CSR2 | MG(+) x CSR2         | -23.9550 | 8.6067 | 0.0001 | *** |
|                | MG(-) x CSR2         | -17.2217 | 6.1875 | 0.0018 | **  |
|                | MG(+) x Mg(-) x CSR2 | -11.2333 | 4.0360 | 0.0758 |     |
| MG(+) x CSR2   | MG(-) x CSR2         | 6.7333   | 2.4192 | 0.5357 |     |
|                | MG(+) x MG(-) x CSR2 | 12.7217  | 4.5707 | 0.0322 | *   |
| MG(-) x CSR2   | MG(+) x MG(-) x CSR2 | 5.9883   | 2.1515 | 0.6538 |     |

The significance between each of the groups was calculated as a *P* value. \**P* < 0.05; \*\* *P* < 0.01; \*\*\**P* < 0.001.

**Table S5** Pairwise comparisons using Tukey HSD among groups on viral accumulation rate (values logarithm transformed) in transgenic and control lines upon BmNPV treatment was done after post-hoc analysis of the corresponding treatment factor using main effects in a one-way ANOVA.

|         | Lines         | Mean Difference | Test Statistics | P level | Significance |
|---------|---------------|-----------------|-----------------|---------|--------------|
| Control | IE            | 0.5094          | 9.0023          | 0.0001  | ***          |
|         | MG(+/-)       | 1.0496          | 18.5470         | 0.0001  | ***          |
|         | MG(+)         | 0.5066          | 8.9521          | 0.0001  | ***          |
|         | MG(-)         | 0.7257          | 12.8241         | 0.0001  | ***          |
|         | MG(+) x MG(-) | 0.9304          | 16.4417         | 0.0001  | ***          |
| IE      | MG(+/-)       | 0.5401          | 9.5448          | 0.0001  | ***          |
|         | MG(+)         | -0.0028         | 0.0501          | 1.0000  |              |
|         | MG(-)         | 0.2163          | 3.8219          | 0.0961  |              |
|         | MG(+) x MG(-) | 0.4210          | 7.4394          | 0.0002  | ***          |
| MG(+/-) | MG(+)         | -0.5430         | 9.5949          | 0.0001  | ***          |
|         | MG(-)         | -0.3239         | 5.7229          | 0.0029  | **           |
|         | MG(+) x MG(-) | -0.1191         | 2.1053          | 0.6732  |              |
| MG(+)   | MG(-)         | 0.2191          | 3.8720          | 0.0888  |              |
|         | MG(+) x MG(-) | 0.4238          | 7.4896          | 0.0002  | ***          |
| MG(-)   | MG(+) x MG(-) | 0.2047          | 3.6176          | 0.1308  |              |

The significance between each of the groups was calculated as a *P* value. \*\**P* < 0.01; \*\*\**P* < 0.001.



**Table S6** List of 10 SSR loci with primer sequences, annealing temperature, MgCl<sub>2</sub> concentration and corresponding amplicon size used to genotype the BC<sub>4</sub>F<sub>6</sub> population.

| Marker            | Forward Primer 5' to 3' | Reverse Primer 5' to 3' | T <sub>m</sub><br>(°C) | MgCl <sub>2</sub><br>(mM) | Amplicon size<br>(bp) |
|-------------------|-------------------------|-------------------------|------------------------|---------------------------|-----------------------|
| <b>Bmg sat001</b> | TTAACCGCGATGTGACTGAA    | TGACCGGCACTAAATATGGA    | 55                     | 1.8                       | 1200 - 1304           |
| <b>Bmg sat015</b> | CATAGACGCCGGGAATC       | CGCGTAATTCGTTTCAAAT     | 55                     | 1.8                       | 500 - 540             |
| <b>Bmg sat031</b> | AGACACAGATGGCGATGATG    | CTCCAAGGACCTTCGCTTC     | 55                     | 1.8                       | 700 - 730             |
| <b>Bmg sat084</b> | TCGTGGTAGACCAGCGATAG    | GATTTGCCCTCGAAGTTGAC    | 55                     | 1.8                       | 1145 - 1200           |
| <b>Bmg sat095</b> | GGTCTTCTTCACGTGCTGGT    | TGCCGGATCCAAGTTCTTTA    | 55                     | 1.8                       | 780 - 1035            |
| <b>Bmg sat098</b> | CATGCATTTACCCTCTCCAC    | GTGAATTCGCTACTGGCAAA    | 55                     | 1.8                       | 850 - 1000            |
| <b>Bmg sat108</b> | CCAGGTCATCATGAAGAAGG    | ACTGGCTCTGGCAGGTGTT     | 55                     | 1.8                       | 1005 - 1050           |
| <b>Bmg sat114</b> | CGTCTCTATCTGCGGACGTT    | TCAGCTTAGGCAATCCAAGG    | 55                     | 1.8                       | 627 - 700             |
| <b>Bm sat070</b>  | ACCCTCTACGTAGTATATG     | CAGCCTTTTTCAAGGCTAA     | 55                     | 1.8                       | 107 - 148             |
| <b>Bm sat102</b>  | GCTCGCCATATGCAATCCTC    | CGTCATTGCCTTCATTCAGTTC  | 55                     | 1.8                       | 143 - 186             |
