# Supplementary material
Source: PubMed Central journal article supplement (PMC3527255)
Supplement: e7bbe91dc35f92038338bd9817ae9899_genetics.112.144402-5.pdf [file e7bbe91dc35f92038338bd9817ae9899_genetics.112.144402-5.pdf]

File S2

Sequence of the selected viral genes

1. The entire *ie1* of BmNPV is 1755 bp, the targeted region is 141 – 450 bp (310 bp)

***ie1* (Accession Number L33180)**

TGGAGCCGACACGGTAGTATCTGACAGCGAGACTGCAGCAGCTTCAAACCTTTTGGCAAGCGTCAATTCGTTAACTGATGATAACGAT  
ATAATGGAATGTTTGCTCAAGACCACTGATAATCTCGGAGAAGCAGTTAGTTCTGCTTATTATTCGGAATCCCTTGAGCTGCCTGTTGC  
GGAGCAACCATCGCCAGTTCTGCTTATAATGCGGAATCTTTGAGCAGTCTGTTGGTGTGAACCAACCATCGGCAGCTGGAACATAAC  
GGAAGCTGGACGAATACTTGGACGATTCAAAAGTGTGGTGGGC

2. The entire *lef1* of BmNPV is 813 bp, the targeted region is 80 – 405 bp (326 bp)

***lef1* (Accession Number L33180):**

GTCACCGGACCACATCCACCAATCCATAACCAGGATAGCATTGCTTTAATTTGTCTAGCAATTCCTTTGTTATACAACGAGAAAATTTAGTTC  
CCTTATAATTATAGCTGTACGGTGCGGTATTTGTTGTTAACGTTACAAAAATATCCCTGTCCACGTCCGGCCAATACTGCAACGTGAGCGC  
GTCCAAGTTTGAATCTTGCATATGCGGAATGTACAAACGTACGGCCTCTCTCACACAATGCGCAAACTGCCGGCTGAATGCAATCACTATC  
CAACTTTCAGGTTTTTCGAAGGCCTTGTACCGATGCACGCGAAC

3. The entire *lef3* of BmNPV is 1158 bp, the targeted region is 391 – 706 bp (316 bp)

***lef3* (Accession Number L33180):**

TCTTGCGTTTGTGCAATTTGCAAATTTGAATAGGCTTCGTTTTCTTTAGCCTCGCACAATTCGATGCGCGTAGAGTTGACCACGTTCCAATCA  
TGACACGTTTGTCCATTGAAAATTTGTTGACATTTTATATTGTAATGGTAAAGATTTGGTTTTTATTGCTTTTAAATATTTAAACACCTCAT  
TGATGTCGTCAGACCCCTTATATTGTTTTGAATAGATTCATCAGTGTTTTCGCATTGACAAAACATTCACCTTGAACCACGTCGGAATCGTC  
GTTAAAATTTTGTACGCGACTTCAAAAACA

4. The entire *p74* of BmNPV is 1938 bp, the targeted region is 1243 – 1552 bp (310 bp)

***p74* (Accession Number L33180):**

GTTGGCCAGCATTTTGAAAGTGACAAGAATCGTGTGCGCCAGCACGAATCCGACGAGCGATTCCCACCATCTAAACGAACAGCCGCCGTTGA  
ATAGATTTCTGCCGAATCGTCGACAGTAGGCTTCGTTGAATTCGCCTTTAAAGCGTTCCGGGAAACAAGGGATCGGGATCGGGCCGAACGTTA  
AAAGCCGGCACATCGTCCACGCCCATGATCGTGTGTTCTCGGTGCGCAAGTATGGGCTGTTAAAGTACATTTTGGACAGCGAGTCCACCAA  
GATGCATCTGTTGTCGGGCGTGTATCTAAACTCG
