# Supplementary material
Source: PubMed Central journal article supplement (PMC3527255)
Supplement: f85cae11faf77870c40919345175fc47_genetics.112.144402-6.pdf [file f85cae11faf77870c40919345175fc47_genetics.112.144402-6.pdf]

**Table S6** List of 10 SSR loci with primer sequences, annealing temperature, MgCl<sub>2</sub> concentration and corresponding amplicon size used to genotype the BC<sub>4</sub>F<sub>6</sub> population.

| Marker            | Forward Primer 5' to 3' | Reverse Primer 5' to 3' | T <sub>m</sub><br>(°C) | MgCl <sub>2</sub><br>(mM) | Amplicon size<br>(bp) |
|-------------------|-------------------------|-------------------------|------------------------|---------------------------|-----------------------|
| <b>Bmg sat001</b> | TTAACCGCGATGTGACTGAA    | TGACCGGCACTAAATATGGA    | 55                     | 1.8                       | 1200 - 1304           |
| <b>Bmg sat015</b> | CATAGACGCCGGGAATC       | CGCGTAATTCGTTTCAAAT     | 55                     | 1.8                       | 500 - 540             |
| <b>Bmg sat031</b> | AGACACAGATGGCGATGATG    | CTCCAAGGACCTTCGCTTC     | 55                     | 1.8                       | 700 - 730             |
| <b>Bmg sat084</b> | TCGTGGTAGACCAGCGATAG    | GATTTGCCCTCGAAGTTGAC    | 55                     | 1.8                       | 1145 - 1200           |
| <b>Bmg sat095</b> | GGTCTTCTTCACGTGCTGGT    | TGCCGGATCCAAGTTCTTTA    | 55                     | 1.8                       | 780 - 1035            |
| <b>Bmg sat098</b> | CATGCATTTACCCTCTCCAC    | GTGAATTCGCTACTGGCAAA    | 55                     | 1.8                       | 850 - 1000            |
| <b>Bmg sat108</b> | CCAGGTCATCATGAAGAAGG    | ACTGGCTCTGGCAGGTGTT     | 55                     | 1.8                       | 1005 - 1050           |
| <b>Bmg sat114</b> | CGTCTCTATCTGCGGACGTT    | TCAGCTTAGGCAATCCAAGG    | 55                     | 1.8                       | 627 - 700             |
| <b>Bm sat070</b>  | ACCCTCTACGTAGTATATG     | CAGCCTTTTTCAGGGCTAA     | 55                     | 1.8                       | 107 - 148             |
| <b>Bm sat102</b>  | GCTCGCCATATGCAATCCTC    | CGTCATTGCCTTCATTCAGTTC  | 55                     | 1.8                       | 143 - 186             |
